# A Non-Canonical Function of Arabidopsis ERECTA Proteins in Gibberellin Signaling

Elzbieta Sarnowska<sup>a#</sup>, Szymon Kubala<sup>b#</sup>, Pawel Cwiek<sup>b#</sup>, Sebastian Sacharowski<sup>b</sup>, Paulina Oksinska<sup>b</sup>, Jaroslaw Steciuk<sup>b</sup>, Magdalena Zaborowska<sup>b</sup>, Jakub M. Szurmak<sup>b</sup>, Roman Dubianski<sup>a</sup>, Anna Maassen<sup>b</sup>, Malgorzata Stachowiak<sup>a</sup>, Bruno Huettel<sup>c</sup>, Monika Ciesla<sup>b</sup>, Klaudia Kogut<sup>b</sup>, Anna T. Rolicka<sup>b,d</sup>, Saleh Alseikh<sup>e,f</sup>, Ernest Bucior<sup>b</sup>, Rainer Franzen<sup>g</sup>, Anna Klepacz<sup>b</sup>, Malgorzata A. Domagalska<sup>g</sup>, Samija Amar<sup>g</sup>, Janusz A. Siedlecki<sup>a</sup>, Alisdair R. Fernie<sup>e,f</sup>, Seth J. Davis<sup>g,h,i</sup> <sup>\*^</sup>, Tomasz J. Sarnowski<sup>b\*^</sup>

<sup>a</sup> Maria Sklodowska- Curie National Research Institute of Oncology, Roentgena 5, Warsaw, Poland

<sup>b</sup> Institute of Biochemistry and Biophysics Polish Academy of Sciences, Pawinskiego 5A Warsaw, Poland

<sup>c</sup> Max Planck Genome Centre Cologne, D-50820 Cologne, Germany

<sup>d</sup> Faculty of Biology, University of Warsaw, Warsaw, Poland

<sup>e</sup> Max Planck Institute of Molecular Plant Physiology, 14476 Potsdam-Golm, Germany

<sup>f</sup> Center for Plant Systems Biology and Biotechnology, 4000 Plovdiv, Bulgaria

<sup>g</sup> Max-Planck Institute for Plant Breeding Research; D-50829 Cologne, Germany

<sup>h</sup> State Key Laboratory of Crop Stress Biology, School of Life Sciences, Henan University, 13 Kaifeng 475004, China

<sup>i</sup> Department of Biology, University of York, York YO10 5DD, UK

**Funding information:** National Science Centre (Poland) UMO-2011/01/B/NZ1/00053 (TJS), UMO-2015/16/S/NZ2/00042 (SK), UMO-2011/01/N/NZ1/01525 (ATR), UMO-2011/01/N/NZ1/01530 (EB), UMO-2017/01/X/NZ2/00282 (AM), UMO-2018/28/T/NZ2/00455 (PC), START 092.2016 fellowship by the Foundation for Polish Science (SS), Deutsche Forschungsgemeinschaft (DFG) DFG-DA1061/2-1, 111 Project grant D16014, BBSRC-BB/M000435/1, and Max-Planck Gesellschaft (MPG) core funding (SJD), scholarship of Ministry of Science and Higher Education (MNiSW) No. 466/STYP/11/2016 (SK), SA and ARF acknowledge funding of the PlantaSYST project by the European Union's Horizon 2020 research

32 and innovation programme (SGA-CSA No 664621 and No 739582 under FPA No. 664620), the  
33 equipment used was sponsored in part by the Centre for Preclinical Research and Technology  
34 (CePT), a project co-sponsored by European Regional Development Fund and Innovative  
35 Economy, The National Cohesion Strategy of Poland.

36

37 The authors declare no competing interest.

38 # shared first authorship

39 \* senior authors

40 ^ address correspondence to:

41 **Tomasz J. Sarnowski** [tsarn@ibb.waw.pl](mailto:tsarn@ibb.waw.pl)

42 **Seth J. Davis** [seth.davis@york.ac.uk](mailto:seth.davis@york.ac.uk)

43 **Corresponding authors:** Seth J. Davis and Tomasz J. Sarnowski

44 **Senior authors:** Seth J. Davis and Tomasz J. Sarnowski

45

46 **Short title: The Role of ERECTA and SWI3B in GA Signaling**

47 **ONE SENTENCE SUMMARY:** ERECTA leucine-rich receptor-like kinase and SWI3B subunit  
48 of SWI/SNF chromatin remodeling complex cooperate in direct transcriptional control of *GIDI*  
49 genes in Arabidopsis.

50

51 **Authors Contributions**

52 TJS, ES, and SJD planned experiments and wrote the manuscript

53 SK and PC participated in the planning of some experiments

54 TJS, ES, SK, PC, SS, SA, BH, JAS, and ARF analyzed the data

55 ES, PC, SS, SK, PO, JS, MZ, JMS, RD, AM, MS, BH, MC, KN, ATR, EB, RF, AK, MAD, SA,  
56 and TJS performed experiments

57 All authors read, edited, and approved the final manuscript

58 **Key Words:** Arabidopsis, ERECTA, ERECTA-LIKE1, ERECTA-LIKE2, LRR-RLK, SWI/SNF,  
59 SWI3B, HER2, Chromatin

60

61 **Abbreviations and Acronyms:**

62 ERf, ERECTA family; ER, ERECTA; ERL1, ERECTA-LIKE 1; ERL2, ERECT-LIKE 2; LRR-  
63 RLKs, leucine-rich repeat receptor-like kinases; CRC, chromatin remodeling complex;  
64 SWI/SNF, Switch/Sucrose Nonfermenting; *GIDI*, *GIBBERELLIN INSENSITIVE DWARF 1*; GA,  
65 gibberellin; PAC, Paclobutrazol; qRT-PCR, quantitative real-time PCR; BFA, Brefeldin A; NLS,  
66 nuclear localization signal; KDER, the kinase domain of ERECTA; TSS, transcription start site;  
67 EGFR, epidermal growth factor receptor.

68

69 **Abstract**

70 The Arabidopsis ERECTA family (ERf) of leucine-rich repeat receptor-like kinases  
71 (LRR-RLKs), comprising ERECTA (ER), ERECTA-LIKE 1 (ERL1) and ERECTA-LIKE 2  
72 (ERL2), control epidermal patterning, inflorescence architecture, stomata development, and  
73 hormonal signaling. Here we show that the *er/erl1/erl2* triple mutant exhibits impaired  
74 gibberellin (GA) biosynthesis and perception alongside broad transcriptional changes. ERf  
75 proteins interact in the nucleus, *via* kinase domains, with the SWI3B subunit of the SWI/SNF  
76 chromatin remodeling complex (CRCs). The *er/erl1/erl2* triple mutant exhibits reduced SWI3B  
77 protein level and affected nucleosomal chromatin structure. The ER kinase phosphorylates  
78 SWI3B *in vitro*, and the inactivation of all ERf proteins leads to the decreased phosphorylation of  
79 SWI3B protein *in vivo*. Correlation between DELLA overaccumulation and SWI3B proteasomal  
80 degradation together with the physical interaction of SWI3B with DELLA proteins explain the  
81 lack of RGA accumulation in the GA- and SWI3B-deficient *erf* mutant plants. Co-localization of  
82 ER and SWI3B on *GIDI* (*GIBBERELLIN INSENSITIVE DWARF 1*) DELLA target gene  
83 promoter regions and abolished SWI3B binding to *GIDI* promoters in *er/erl1/erl2* plants  
84 supports the conclusion that ERf-SWI/SNF CRC interaction is important for transcriptional  
85 control of GA receptors. Thus, the involvement of ERf proteins in transcriptional control of gene  
86 expression, and observed similar features for human HER2 (Epidermal Growth Family Receptor-  
87 member), indicate an exciting target for further studies of evolutionarily conserved non-canonical  
88 functions of eukaryotic membrane receptors.

89

## 90 **Introduction**

91           The ERECTA family (ERf) of leucine-rich-repeat receptor-like kinases (LRR-RLKs)  
92 consists of three members: ERECTA (ER), ERECTA-LIKE 1 (ERL1), and ERECTA-LIKE 2  
93 (ERL2). ERf proteins carry extra-cellular leucine-rich repeats (LRRs), as well as transmembrane  
94 and cytosolic kinase domains (Shpak et al., 2004; Torii et al., 1996, Kosentka et al., 2017).  
95 Inactivation of *ERECTA* leads to inflorescence, pedicels, and siliques compaction, while the  
96 individual loss of either *ERL1* or *ERL2* function has a limited effect on Arabidopsis development  
97 (Shpak et al., 2004). ERf proteins are functionally redundant-their simultaneous inactivation  
98 results in dramatic growth retardation, severe dwarfism, enlargement of the shoot apical meristem  
99 (SAM), clustered stomata, and sterility. ERf regulates stem cell homeostasis *via* buffering  
100 cytokinin responsiveness and auxin perception in SAM and modulating the balance between stem  
101 cell proliferation and consumption (Shpak et al., 2004; Griffiths et al., 2006; Torii et al., 2007;  
102 Chen et al., 2013; Shpak, 2013; Uchida et al., 2013; Zhang et al., 2021). ERECTA controls the  
103 expression of genes associated with gibberellin (GA) metabolism (Uchida et al., 2012a)  
104 restricting xylem expansion downstream of the GA pathway (Ragni et al., 2011). It additionally  
105 regulates shade avoidance in a GA and auxin-dependent manner (Du et al., 2018) and  
106 ethylene-induced hyponastic growth (Van Zanten et al., 2010).

107           Overexpression of ER variant lacking the C-terminal kinase domain (ER $\Delta$ K) caused more  
108 severe developmental defects than complete inactivation of *ERECTA*, suggesting an interaction  
109 of the kinase domain with important regulatory partners (Shpak, 2003). ERECTA interacts with  
110 ERL1 and ERL2 to form receptor complexes recognizing two endodermis-derived peptide  
111 hormones (EPFL4 and EPFL6), regulating vascular differentiation and stem elongation. ERf  
112 proteins additionally form complexes with the receptor-like protein TOO MANY MOUTHS  
113 (TMM), which controls stomatal differentiation by recognition of the secretory peptides  
114 EPIDERMAL PATTERNING FACTOR 1 (EPF1), EPF2, and stomagen (Lee et al., 2012;  
115 Uchida et al., 2012a; Lee et al., 2015b).

116           ERL2 has been found to undergo endocytosis (Ho et al., 2016), suggesting that ERf  
117 proteins may play, as yet uncharacterized, regulatory roles upon internalization, in addition to  
118 their functions as ligand-binding membrane receptors. ERECTA signaling, in tandem with the  
119 SWR1 chromatin remodeling complex (CRC), controls the expression of the *PACLOBUTRAZOL*  
120 *RESISTANCE 1 (PRE1)* family genes. This observation supports their role in the GA signaling

121 pathway, however, neither direct interaction between ERECTA and SWR1 nor the direct  
122 influence of ERECTA signaling on chromatin structure or SWR1 activity has, as yet, been  
123 demonstrated (Cai et al., 2017; Cai et al., 2021).

124 Here we show that the loss of all ERF proteins in the *er/erl1/erl2* triple mutant (*erf*) results  
125 in broad transcriptomic changes affecting hormonal, developmental, and metabolic processes.  
126 Inactivation of ERF proteins caused down-regulation of the GA receptor *GIDI* (*GIBBERELLIN*  
127 *INSENSITIVE DWARF 1*) genes expression and decreased bioactive GA levels. The ER protein  
128 undergoes endocytosis and enters the nucleus. All three ERF proteins interact in the nucleus with  
129 the SWI3B core subunit of the SWI/SNF CRCs. The kinase domain of the ER protein exhibits the  
130 ability to phosphorylate SWI3B protein. The physical interaction of SWI3B with RGA and  
131 RGL1, together with identified correlation between DELLA accumulation and SWI3B  
132 proteasomal degradation, provide an explanation as to why GA-deficient *erf* mutant plants did  
133 not overaccumulate RGA. These data collectively suggest cooperation of ERF-signaling with  
134 SWI/SNF in the modulation of gene transcription. The ER and SWI3B also co-localized in the  
135 promoter regions of *GIDI* DELLA target genes. In the *erf* mutant, the binding of SWI3B to *GIDI*  
136 promoters was abolished. These results collectively suggest that ERF proteins directly control GA  
137 receptor expression by restricting recruitment of the SWI/SNF CRCs to its target *loci*.

138

139 **Results**

140 **Inactivation of *Erf* Proteins Has a Broad Effect on the Arabidopsis Transcriptome**  
141 **including GA Signaling.**

142           The Arabidopsis *er/er11/er12* plants exhibit severe dwarfism, dark green color, defects in  
143 vascular development, stem elongation, and stomatal differentiation, as well as complete sterility  
144 (Figure 1 A, Supplemental Figure 1A, (Shpak et al., 2004)).

145

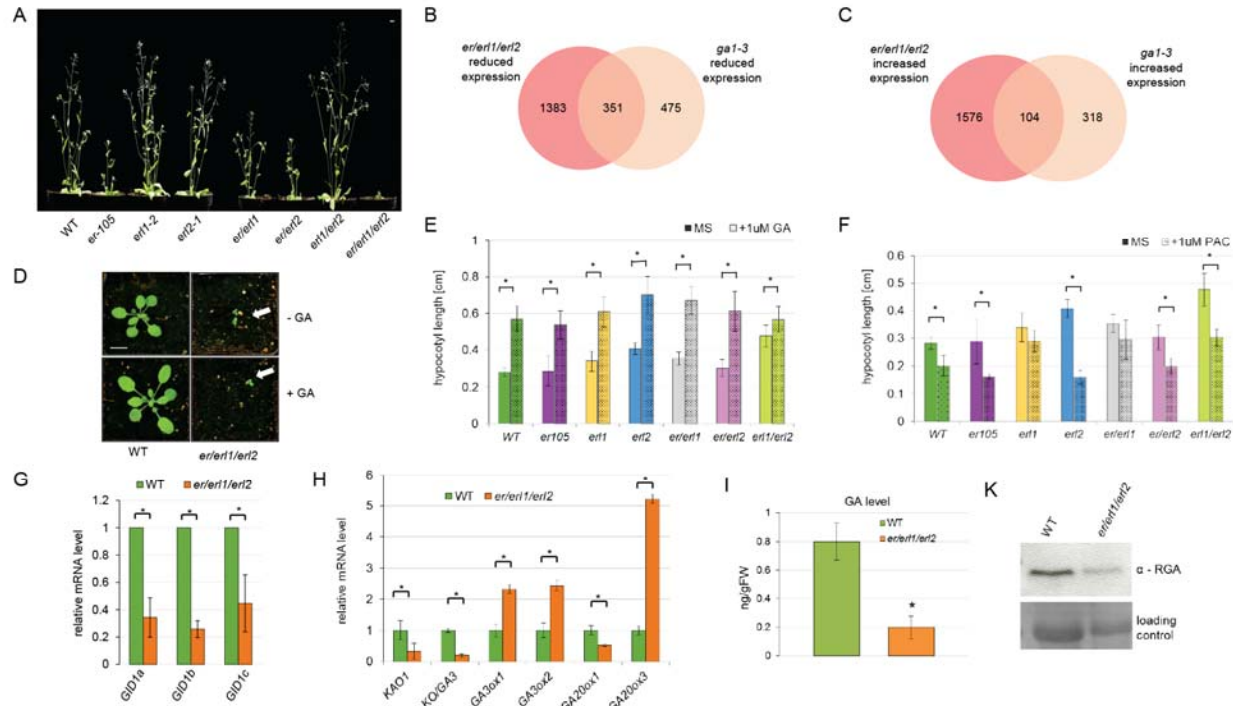

146  
 147 **Figure 1.** *ERf* inactivation affects Arabidopsis development, causes transcriptomic changes  
 148 overlapping with the effect of *gal-3* mutation and impairs GA biosynthesis and signaling (See  
 149 also Figures S1, S2 and S3). A, Phenotypic changes conferred by combinations of *erf* mutations.  
 150 Scale bar= 1 cm. B, Overlapping down-regulated genes in *er/er1/er2* and *gal-3* plants. C,  
 151 Overlapping up-regulated genes in *er/er1/er2* and *gal-3* plants. D, The *er/er1/er2* plants  
 152 exhibit impaired GA response. 14-days old LD (12h day/12 night) grown WT and *er/er1/er2*,  
 153 sprayed twice a week with water (upper row) or 100 $\mu$ M GA<sub>4+7</sub> (lower row). Arrows-*er/er1/er2*  
 154 plants. Scale bar= 1cm. E, The GA response is retained to various levels in combinations of *erf*  
 155 mutants. Error bars-SD,\* = P < 0.05, Student's *t*-test, n= 30 plants. F, The response of various *erf*  
 156 mutants to 1 $\mu$ M Paclobutrazol treatment. Error bars-SD,\* = P < 0.05, Student's *t* test, n= 30  
 157 plants. G, The *er/er1/er2* mutant exhibits altered transcription of *GID1* GA receptor genes (error  
 158 bars-SD, P < 0.05, Student's *t*-test, three biological and technical replicates were assayed). H,  
 159 The *er/er1/er2* mutant displays altered GA biosynthesis and metabolism-related genes  
 160 expression (error bars-SD, P < 0.05, Student's *t*-test, three biological and technical replicates  
 161 were assayed). I, The *er/er1/er2* mutant exhibits dramatically reduced level of bioactive GA<sub>4+7</sub>  
 162 gibberellin (error bars-SD, P < 0.05, Student's *t*-test, three biological and technical replicates  
 163 were assayed). J, The *er/er1/er2* mutant shows decreased level of the DELLA protein RGA.  
 164



165           Given the severe phenotypic alterations of the *er/erl1/erl2* plants, we performed transcript  
166 profiling with Affymetrix ATH1 microarrays on RNA samples from aerial parts of the  
167 *er/erl1/erl2* mutant and WT (wild type) adult plants (representing the most comparable stage of  
168 the development) grown for 5 weeks under long-day conditions (16h day/8h night). Data analysis  
169 identified 1734 versus 1680 genes showing >1.50-fold decrease and increase, respectively, of  
170 transcript levels in *er/erl1/erl2* comparing to WT (Supplemental Figure 1B, Supplemental  
171 Dataset 1 Sub-tables 1, 2). Gene Ontology (GO) terms of primary metabolism, developmental  
172 processes, and response to hormones were enriched among the *er/erl1/erl2* down-regulated genes  
173 (Supplemental Dataset 1 Sub-table 3). Among these, 27 genes were classified to GA-response  
174 (Supplemental Table 1, Supplemental Dataset 1 Sub-tables 1, 3). The up-regulated genes were  
175 classified into GO-terms of chloroplast-related metabolic and light-regulated transcription  
176 processes, responses to cytokinin, and auxin degradation (Supplemental Dataset 1 Sub-Tables  
177 2,4). Several genes acting in leaf epidermal and stomatal cell differentiation showed enhanced  
178 transcription in the *er/erl1/erl2* mutant (Supplemental Table 2). In conclusion, the inactivation of  
179 ERF altered transcriptional regulation of hundreds of targets, including a set of GA-regulated  
180 genes.

181           Phenotypic traits exhibited by double and triple *erf* mutants resemble those of double and  
182 triple *gid1abc* (*gibberellin insensitive dwarf 1a, b and c*) plants (Figure 1A; (Griffiths et al.,  
183 2006)). Inactivation of *GID1abc* genes has a nearly identical effect on the Arabidopsis  
184 transcriptome as the severe GA-deficient mutant *gal-3* (Willige et al., 2007), thus we compared  
185 the transcriptomic data available for the *gal-3* mutant with those caused by inactivation of all *ERF*  
186 genes.

187           We identified a large overlap of differentially expressed genes (DEG) in the *er/erl1/erl2*  
188 and *gal-3* lines. Among 826 genes down-regulated in the *gal-3* line, 351 (about 42.5%) also  
189 exhibited decreased expression in the *er/erl1/erl2* plants (Figure 1B), while 104 genes (about  
190 24.6% of *gal-3* up-regulated genes) were up-regulated in both lines (Figure 1C). Only 33 genes  
191 were up-regulated in *gal-3* but down-regulated in *er/erl1/erl2* (Supplemental Figure 1C), and  
192 only 64 genes down-regulated in *gal-3* but up-regulated in *er/erl1/erl2* (Supplemental Figure  
193 1D). DEG common to *gal-3* and *er/erl1/erl2* lines belonged to both DELLA (repressors of GA  
194 pathway) -dependent and DELLA-independent classes (Cao et al., 2006), regardless of whether  
195 they display co-regulation or contrasting regulation in these lines (Supplemental Figure 1E and

196 F). This suggests the involvement of Arabidopsis ERF proteins in the control of GA-related  
197 processes. Therefore, we next tested the response of *er/erl1/erl2* plants to exogenously supplied  
198 bioactive 100  $\mu$ M GA<sub>4+7</sub> and found that spraying of the *er/erl1/erl2* mutant grown under LD  
199 condition (12h day/12h night) did not lead to increased leaf size by day 14 compared to the  
200 remarkable expansion of control WT rosette leaves (Figure 1D, Supplemental Figure 2A). Thus  
201 *er/erl1/erl2* displayed GA insensitivity. Nonetheless, the GA-treatment resulted in bolting of  
202 *er/erl1/erl2* plants, only after over two months (Supplemental Figure 2B and C), indicating their  
203 residual response to GA.

204 Although we showed that ERF proteins are involved in the GA response, it remained  
205 unclear whether proper GA perception requires all ERF proteins. Thus, we tested the hypocotyl  
206 response of single and double *erf* mutants in various combinations to the treatment with 1  $\mu$ M  
207 GA<sub>4+7</sub> or 1  $\mu$ M Paclobutrazol (PAC), an inhibitor of GA biosynthesis. The GA response was  
208 retained to various levels in all tested mutants (Figure 1E) while the *erl1* and *er/erl1* plants had an  
209 impaired response to PAC and *erl1/erl2* displayed a significant reduction of hypocotyl length  
210 (Figure 1F).

211 Upon crossing *er*, *er/erl1*, and *er/erl2* lines with the *gal-3* mutant, we observed only a  
212 discrete enhancement of the *gal-3* phenotype. However most of the phenotypic changes  
213 characteristic for *gal-3* mutation were retained, indicating that many of the *er*, *erl1*, or *erl2* single  
214 or double mutant phenotypes are likely not exclusively a result of GA deficiency (Supplemental  
215 Figure 2D and E).

216 We have proven that only parallel inactivation of all ERF proteins causes severe  
217 impairment of the GA response. Quantitative real-time PCR (qRT-PCR) measurements of GA  
218 response and biosynthesis genes expression revealed a parallel 2.5 to 3-fold reduction in the  
219 transcript levels of all three *GIDI* GA-receptors in the *er/erl1/erl2* mutant compared to WT  
220 (Figure 1G). The GA-receptor genes *GID1A/B* have been reported to be direct CHIP targets of  
221 RGA, a major DELLA repressor of GA-signaling, which stimulates *GIDI* transcription (Zentella  
222 et al., 2007). The *er/erl1/erl2* triple mutant also displayed altered expression of GA biosynthesis  
223 genes compared to the WT: a 4-fold reduction of mRNA levels of *KAOI* (*ent*-kaurenoic acid  
224 oxidase) and *KO* (*ent*-kaurene oxidase), a 2.5-fold increase of mRNA levels of GA-repressed  
225 *GA3ox1* and *GA3ox2* (GIBBERELLIN 3 BETA-HYDROXYLASE 1 and 2), a 2-fold inhibition  
226 and 5-fold up-regulation, respectively, of mRNA levels corresponding to the *GA20ox1* and

227 *GA20ox3* genes (Figure 1H). This indicated that the ERF proteins not only influence the  
228 expression of GA receptors, but also genes associated with GA biosynthesis. We subsequently  
229 found a substantial decrease of bioactive GA<sub>4</sub> as well as GA<sub>12</sub>, and GA<sub>24</sub> intermediates in  
230 *er/er11/er12* mutant (Figure 1I, Supplementary Figure 3). Counterintuitively, the Western blotting  
231 using a specific antibody (Willige et al., 2007) detected reduced levels of RGA in the *er/er11/er12*  
232 mutant plants (Figure 1J). Our results indicate that the parallel inactivation of all ERF proteins  
233 results in co-ordinate deregulation of GA biosynthesis and response pathways in Arabidopsis.

234

### 235 **ERECTA (ER) Protein Undergoes Endocytosis and Migrates to the Nucleus.**

236 In analogy to some human membrane receptors internalizing to endosomes and migrating  
237 to the nucleus (*i.e.*, Giri et al., 2005), the ERL2 member of the ERF undergoes endocytosis (Ho et  
238 al., 2016). We next examined, in detail, the cellular localization of ER by creating C-terminal  
239 GFP fusions with ER (Figure 2A) after verifying genetic complementation of the *er-105* mutation  
240 by a 35S::ER-GFP construct (Supplemental Figure 4).

241

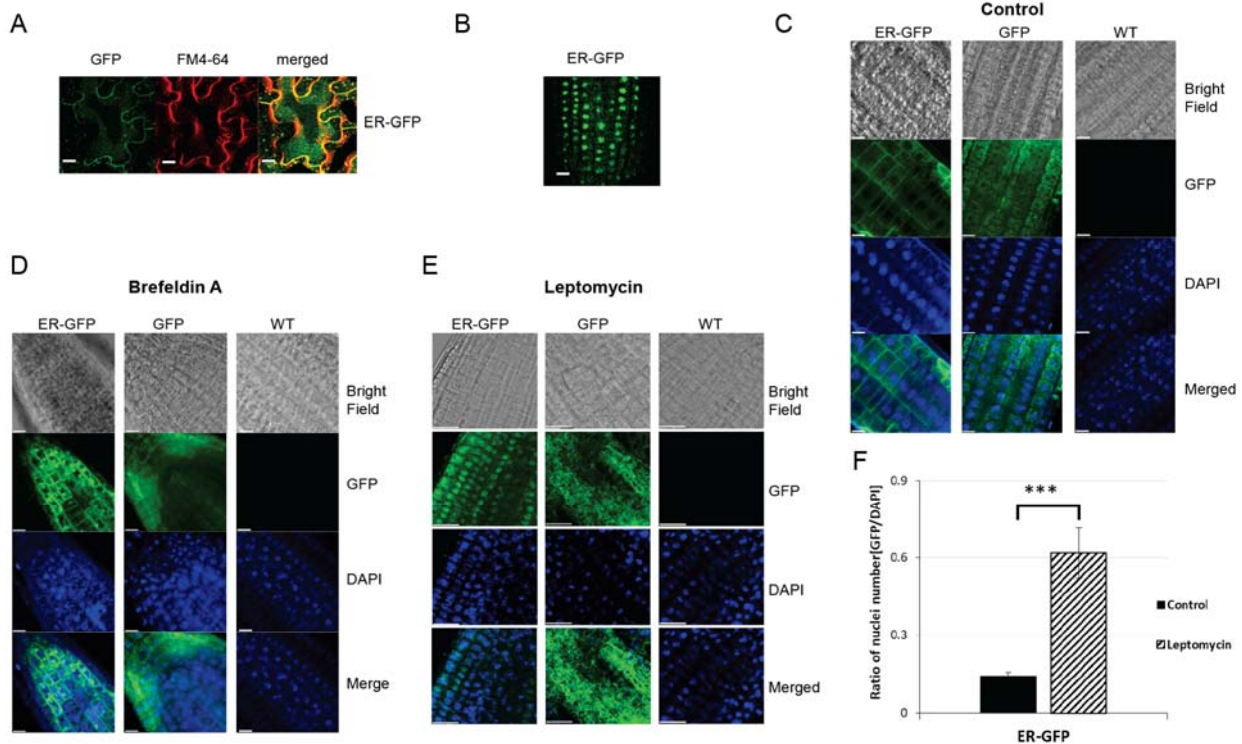

242  
 243 **Figure 2.** Subcellular localization of ERECTA protein (See also Figures S4 and S5). A,  
 244 ERECTA is localized in plasma-membrane and endosomes in epidermal cells of 7-days old  
 245 seedlings. ER-GFP, or free GFP visualized using GFP channel. FM4-64 specifically stains  
 246 plasma-membranes. Scale bar=10 $\mu$ m. B, Root-tip images of approximately two-week-old (14-17  
 247 days) ER-GFP seedlings showing nuclear localization of ERECTA protein at considerable  
 248 frequency. C, Root-tip images of 12-day-old ER-GFP seedlings serving as the control for D and  
 249 E. D, Brefeldin A treatment enhanced the localization of ERECTA protein in Brefeldin A (BFA)  
 250 bodies. Roots of 12-day-old Arabidopsis seedlings. E, Leptomycin B treatment enhanced the  
 251 nuclear localization of ERECTA Free GFP was used as a control in C, D, and E, cell nuclei were  
 252 stained with DAPI, scale bar= 50 $\mu$ m. F, Letomycin B enhances nuclear presence of ER protein.  
 253 The GFP/DAPI ratio calculated per area for roots of plants expressing ER-GFP protein.  
 254

255 As observed earlier (Shpak et al., 2005; Uchida et al., 2012a), a pool of the ER-GFP  
256 protein was detected in association with plasma-membranes of the leaf epidermis. In addition, a  
257 weak localization signal was detected in internal structures, which could represent endosomes  
258 (Figure 2A). In guard cell pairs, ER-GFP protein was also detected in circles around the positions  
259 of nuclei, which were visualized by propidium iodide staining (Supplemental Figure 5A and  
260 Supplemental Movie 1). We also observed with considerable frequency ER protein in the nuclei  
261 of roots of 14- to 17-day-old Arabidopsis plants (Figure 2B), however ER was mainly located in  
262 the plasma membrane and endosome-like structures (Figure 2C).

263 To verify that the ER-GFP protein indeed undergoes endocytosis, we examined its  
264 localization in Arabidopsis seedlings treated with 25 $\mu$ M Brefeldin A (BFA), a compound  
265 preventing Golgi-mediated vesicular transport of membrane proteins to the plasma membrane  
266 (Miller et al., 1992). We observed accumulation of the ER-GFP protein in BFA bodies within 30-  
267 40 min after BFA treatment leading to its accumulation at the nuclei periphery 120 min after  
268 BFA application (Figure 2D, Supplemental Figure 5B). The 4h long 200 nM leptomycin B  
269 treatment (a compound blocking nuclear export by EXPORTINS (Haasen et al., 2002)) resulted  
270 in the ER accumulation in the cell nuclei (Figure 2E, F). ER thus appeared to behave similarly to  
271 certain human plasma-membrane receptors in migrating into the nucleus (Hung et al., 2008; Chen  
272 and Hung, 2015).

273 We noted that ERL1 and ERL2 proteins carry a monopartite nuclear localization signal  
274 (NLS) sequence in their kinase domains, while the ERL1 kinase domain carries an additional  
275 bipartite NLS identified using cNLS Mapper (Kosugi et al., 2009b). The NLS signal in the ER  
276 protein was not recognized, however, all ERf proteins show evolutionally conserved amino acid  
277 sequences in this region (Supplemental Figure 6A). Using the NetNES1.1 (la Cour et al., 2004)  
278 server, we predicted the existence of specific for AtXPO1/AtCRM1 exportin (Haasen et al.,  
279 2002) leucine-rich nuclear export signals (NES) in all ERf proteins (Supplemental Figure 6A).  
280 The subsequent Western-blotting analysis of nuclear extracts (Supplemental Figure 6B)  
281 confirmed the nuclear presence of ER. In addition to the expected full-length forms (140 kDa),  
282 we also detected shorter (~75 kDa) versions of the ERECTA protein with the C-terminal GFP tag  
283 and smaller products of degradation, including free GFP, suggesting an analogy to the human  
284 Epidermal Growth Factor Receptor (EGFR), (Chen and Hung, 2015). The detection of N-  
285 terminally truncated forms of the ERECTA protein carrying a kinase domain resembled the

286 recently reported fate of the XA21 LRR-RLK immune receptor in rice (Park and Ronald, 2012),  
287 where its C-terminal kinase domain enters the nucleus to interact with the OsWRKY62  
288 transcriptional regulator.

289 To assess whether the ERECTA kinase domain (KDER) is imported into the nucleus, we  
290 fused the C-terminal part of ERECTA, harboring the KDER, to a YFP-HA tag (Supplemental  
291 Figure 6C) and expressed this construct in the *er-105* mutant. The presence of KDER-YFPHA  
292 was detected exclusively in cell nuclei (Figure 3A). Furthermore, KDER-YFPHA expression  
293 partially restored the *er-105* rosette and cauline leaf phenotype to WT values (Supplemental  
294 Figure 7A, B). Still, it failed to genetically complement the defect of stem elongation  
295 (Supplemental Figure 7C). Partial genetic complementation of the *er-105* mutation and nuclear  
296 localization of KDER prove that the KDER has a receptor-domain independent signaling  
297 function. Interestingly, by contrast to the full length and kinase domain of ERECTA protein  
298 (Figure 3A), truncated ER $\Delta$ kinase form of ERECTA protein fused to YFP-HA ( $\Delta$ KDER-YFP-  
299 HA) did not enter into the nucleus proving the presence of functional NES and NLS sequences in  
300 the C-terminal part of ERECTA protein.

301



302

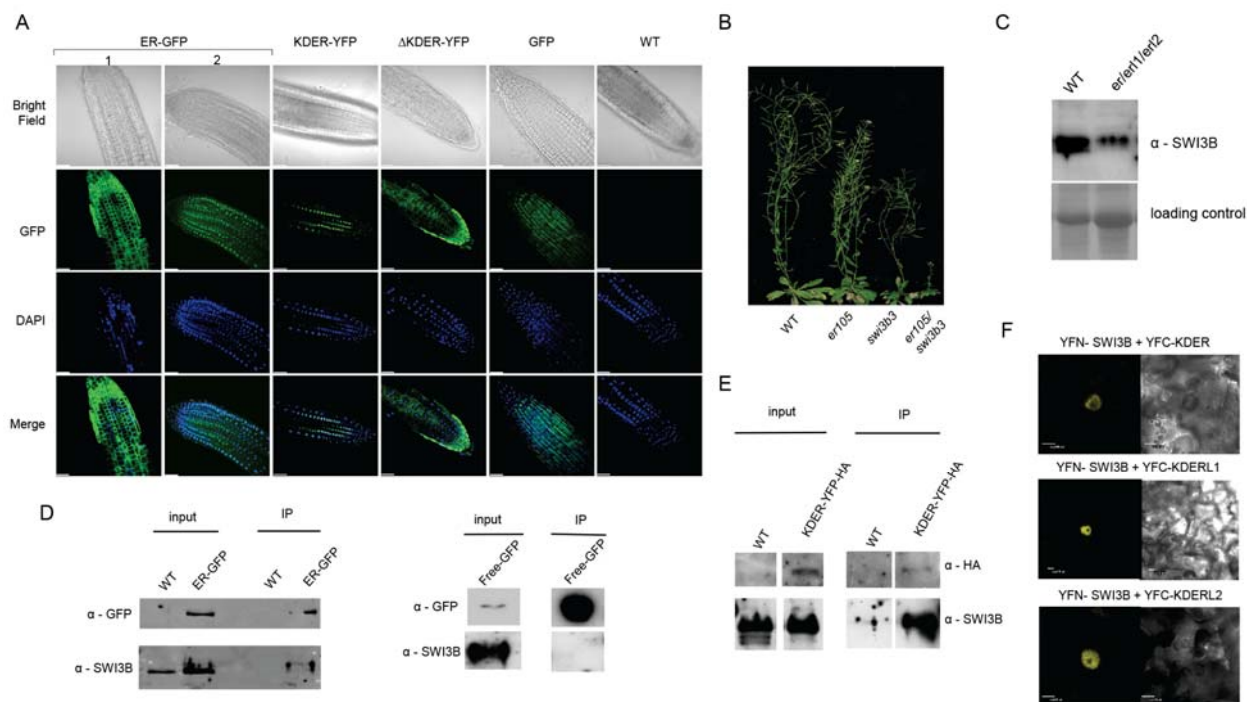

303

304 **Figure 3.** Nuclear function of ERf proteins (See also Figures S6, S7, S8, S9, and S10). A, Root-  
 305 tip images of approximately two-week-old (14-17 days) plants expressing ER-GFP, KDER-YFP-  
 306 HA (the kinase domain of the ER protein), ER $\Delta$ K-YFPHA (truncated ER protein lacking the  
 307 kinase domain) proteins indicating that the kinase domain is necessary for the nuclear localization  
 308 of ER protein. WT and GFP expressing plants-negative controls. Panel 2 in the ER-GFP indicates  
 309 nuclear localization of ER protein appearing at considerable frequency. Cell nuclei were stained  
 310 with DAPI. Scale bar=25  $\mu$ m. B, The *er-105/swi3b3* double mutant shows more retarded growth  
 311 than either *er-105* or *swi3b3* plants. Scale bar= 1cm. C, The *er/erl1/erl2* triple mutant exhibits  
 312 reduced SWI3B protein level. D, ER-GFP or free GFP (negative control) pull-down from the  
 313 nucleus and anti-SWI3B western blotting indicate a specific ER-SWI3B interaction. E,  
 314 Immunoprecipitation of KDER-YFP-HA from the nucleus indicated that the kinase domain of  
 315 ER interacts with SWI3B. F, ER, ERL1, and ERL2 kinase domains interact with SWI3B in the  
 316 nucleus. Bimolecular Fluorescence Complementation assay (BiFC) in epidermis of tobacco  
 317 leaves. Scale bar = 10 $\mu$ m.

318

319           Upon nuclei fractionation (Sarnowski et al., 2002), the ERECTA protein was detected in  
320 the nuclear membrane, soluble nuclear-protein fraction, and chromatin, with its major presence  
321 within the nuclear matrix. The nuclear fractions contained both full-length and N-terminally  
322 truncated ER forms (Supplemental Figure 8) suggest that ER could be involved in either  
323 transcriptional regulation or other nuclear functions.

324

### 325 **ERf Proteins Physically Interact with the SWI3B Core Subunit of SWI/SNF CRC**

326           The weak *swi3b-3* allele (Sáez et al., 2008) carrying, in the *er-105* background, a point  
327 mutation in the *SWI3B* gene encoding a core subunit of the SWI/SNF chromatin remodeling  
328 complex (CRC) exhibit severe dwarfism, altered leaf shape, delayed flowering and reduced  
329 fertility (Figure 3B). We, therefore, introgressed the *swi3b-3* mutation into WT and found that the  
330 phenotypic alterations related to *swi3b-3* were much weaker (slight reduction of growth rate,  
331 leading to decreased plant height, Figure 3B) than the phenotypic traits exhibited by the *er-*  
332 *105/swi3b-3* as well as single *er-105* mutation. The severe phenotypic alterations exhibited by the  
333 *er-105/swi3b-3* plants indicated the likely existence of a strong genetic interaction between the  
334 ERECTA signaling pathway and SWI3B-containing SWI/SNF CRCs. This observation is in line  
335 with *i*) the direct binding of 15 out of 27 potential ERf target genes related to the GA signaling  
336 pathway (Supplemental Table 1) by SWI/SNF CRCs (Sacharowski et al., 2015; Archacki et al.,  
337 2016; Li et al., 2016); *ii*) the unexpected broad transcriptional changes and severe effects on  
338 Arabidopsis development and hormonal signaling pathways observed in the *er/erl1/erl2* mutant,  
339 and *iii*) the well-recognized function of SWI/SNF CRC in hormonal crosstalk including GA  
340 signaling (Sarnowska et al., 2013; Sarnowska et al., 2016).

341           We next assessed the level of the SWI3B protein in *er/erl1/erl2* plants. We found a  
342 significant decrease in the SWI3B protein abundance (Figure 3C), further suggesting that the ERf  
343 signaling pathway may influence the proper function of SWI3B-containing SWI/SNF CRCs.  
344 Additionally, the SWI3B was found to bind ER-GFP but not free GFP (Figure 3D). Similarly, co-  
345 immunoprecipitation indicated that SWI3B interacts with the kinase domain of ER (Figure 3E).

346           Next, we performed BiFC assays (Hu et al., 2002) in epidermal cells of *Nicotiana*  
347 *benthamiana* and confirmed the SWI3B and ER kinase domain interaction. The YFC-RFP served  
348 as a control unrelated protein with broad intracellular localization (Figure 3F, Supplemental  
349 Figure 9). We also detected the interaction of SWI3B with the kinase domain of the ERL1 or



350 ERL2 (Figure 3F, Supplemental Figure 9), indicating the existence of direct interdependences  
351 between the ERf signaling pathway and SWI/SNF–dependent chromatin remodeling.

352 Moreover, we found similar interactions in the nuclei of human cells for HER2  
353 (Epidermal Growth Factor Receptor- family member), a membrane receptor acting in a non-  
354 canonical signaling mode including translocation to the nucleus (Lee et al., 2015a), and BAF155  
355 a SWI3-type subunit of human SWI/SNF CRCs (Supplemental Figure 10). Thus, our data  
356 indicate that the phenomenon observed for ERf and SWI3B is not limited to Arabidopsis but  
357 rather may be a general feature of SWI/SNF CRCs and membrane receptors.

358  
359 ***ERECTA* and *SWI3B* Interact Genetically and *er/elr1/erl2* Plants Exhibit Alteration in**  
360 **Chromatin Status.**

361 The *er-105/swi3b-3* double mutant exhibited more severe phenotypic traits than both single *er-*  
362 *105* and *swi3b-3* mutant lines (Figure 4A), supporting the observed physical interdependences  
363 between ER and SWI3B.

364

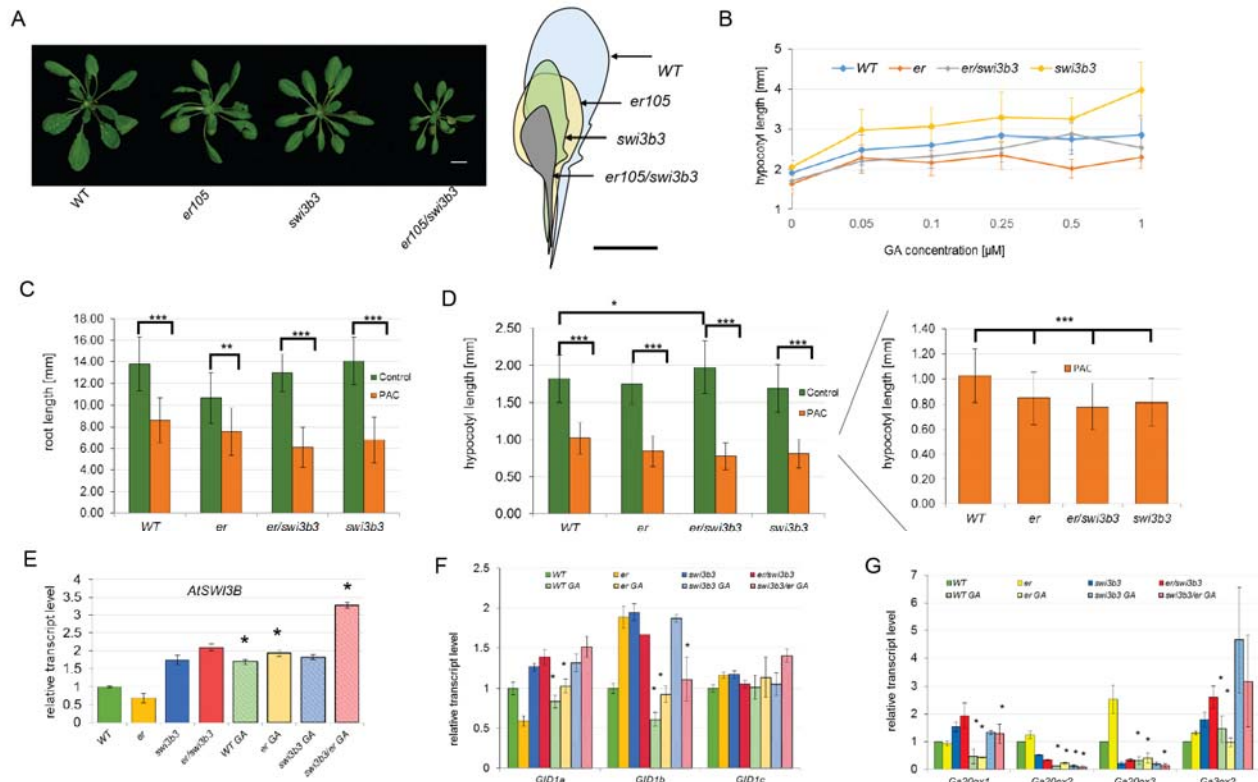

365  
 366 **Figure 4.** ER and *SWI3B* interact genetically and affect both GA biosynthesis and response  
 367 pathways (See also Figures S11 and S12). A, The *er-105/swi3b-3* double mutant exhibits more  
 368 retarded growth than the *er-105* and *swi3b-3* (three-weeks old plants). Graphical alignment of  
 369 corresponding leaves. Scale bar= 1 cm. B, The hypersensitivity of 1-week-old *swi3b-3* hypocotyl  
 370 to GA treatment is abolished by introducing *er-105*. C, Roots of all tested 1-week-old genotypes  
 371 similarly respond to PAC treatment (error bars-SD, \*P < 0.01,\*\* P < 0.001, \*\*\*P<0.0001,  
 372 Student's *t*-test). D, Hypocotyls of all tested 1-week-old genotypes similarly respond to PAC  
 373 treatment, right panel- hypocotyl length comparison for PAC treated plants only (error bars-SD,  
 374 \*P < 0.01,\*\* P < 0.001, \*\*\*P<0.0001 Student's *t*-test). E, *swi3b-3* weak, point mutant line and  
 375 *er-105/swi3b-3* exhibit elevated *SWI3B* transcript level, the *SWI3B* expression is elevated after  
 376 supplementation with bioactive GA<sub>4+7</sub> in all genotypes except *swi3b-3* (error bars-SD, P < 0.05,  
 377 Student's *t*-test). F, The examination of *GID1* genes indicated that almost all examined lines  
 378 responded to GA treatment, but the *swi3b-3* line was insensitive for GA-induced transcriptional  
 379 changes (error bars-SD, P < 0.05, Student's *t*-test). G, The examination of GA biosynthesis genes  
 380 indicated that almost all examined lines responded to GA treatment, but the *swi3b-3* line was  
 381 insensitive for GA-induced transcriptional changes except *GA20ox2* expression (error bars-SD, P  
 382 < 0.05, Student's *t*-test).

383  
384 The treatment with bioactive GA<sub>4+7</sub> gibberellins indicated hypersensitivity of *swi3b-3* to GA  
385 demonstrated by hypocotyl length, while the response of *er-105* was reduced. By contrast, the  
386 GA hypersensitivity of *swi3b-3* was abolished by introduced *er-105* mutation (Figure 4B). All  
387 tested genotypes were responding to PAC treatment in a similar way (Figure 4C, D). The higher  
388 expression of *SWI3B* was visible in the case of the *swi3b-3* mutant, which was even more  
389 pronounced in *er-105/swi3b-3*. The expression of *SWI3B* was elevated after supplementation with  
390 bioactive GA<sub>4+7</sub> in all genotypes, except for the *swi3b-3* line (Figure 4E). The examination of  
391 *GIDI* and GA biosynthesis genes indicated that almost all examined lines responded to GA  
392 treatment while the *swi3b-3* line was insensitive for induced by GA transcriptional changes  
393 except for *GA20ox2* expression (Figure 4F, G). Collectively, our results further indicate that both  
394 ERF signaling and SWI3B-containing CRCs play together an important role in the fine-tuning of  
395 GA signaling in Arabidopsis.

396 To verify the biological effect of observed interactions between ERF signaling and SWI3B-  
397 SWI/SNF, we analyzed the chromatin status, nuclei shape and chromocenters number in the  
398 *er/erl1/erl2* mutant plants. We found that *er/erl1/erl2* plants exhibit increased chromocenter  
399 number and altered spindle-like nuclei shape (Supplemental Figure 11A, B). We furthermore  
400 screened the effect of inactivation of ERfs on genome-wide nucleosome positioning in chromatin  
401 using *micrococcal nuclease* protection assays followed by deep sequencing (MNase-seq) and  
402 confirmatory MNase-qPCR in WT and *er/erl1/erl2* plants.

403 We found that inactivation of ERF proteins has a broad influence on the global  
404 nucleosomal chromatin structure in Arabidopsis- *erf* exhibited 41519 nucleosome occupancy  
405 changes, 13924 "fuzziness" changes and 4055 nucleosome position changes (Supplemental  
406 Figure 12A) and alterations in the presumable regulatory regions upstream of the transcription  
407 start site (TSSs) (Supplemental Figure 12B, Supplemental Dataset 1, Sub-Table 9-14).

408 Among genes with down-regulated expression and altered nucleosome positioning in the  
409 *er/erl1/erl2* mutant were 14 GA-related genes (*ATBETAFRUCT4*, *XERICO*, *PRE1*, *MYBR1*,  
410 *MYB24*, *MIF1*, *HAI2*, *ZPF6*, *GA20ox1*, *CGA1*, *XTH24*, *GID1b*, *RGL1*, and *GIS3*) Interestingly,  
411 seven of them (*ATBETAFRUCT4*, *PRE1*, *MYBR1*, *MIF1*, *XTH24*, *GID1b*, and *RGL1*) were  
412 already observed to be directly targeted by the BRM ATPase of the SWI/SNF CRC (Archacki et  
413 al., 2016; Li et al., 2016).

414 An Integrated Gene Browser (IGB) view of *PRE1*, *GID1a,b* promoter regions indicated  
415 (Supplemental Figure 12D) various nucleosome alterations on promoter regions of these genes in  
416 the *er/erl/erl2* mutant pointing out impaired chromatin remodeling in the absence of functional  
417 ERF proteins. The selected changes were confirmed by MNase-qPCR (Supplemental Figure 12E).

418

#### 419 **The Inactivation of ERF proteins Affects SWI3B Protein Phosphorylation**

420 We tested the ability of KDER to phosphorylate SWI3B protein. We overexpressed,  
421 purified, and subsequently used MBP-His6-KDER and His6-SWI3B (Figure 5A, Supplemental  
422 Figure 13A) for non-radioactive *in vitro* kinase assay. The existence of a strong band  
423 corresponding to phosphorylated SWI3B protein and a weaker band of autophosphorylated  
424 KDER was indicated (Figure 5B, Supplemental Figure 13B, C). The confirmatory mass-  
425 spectrometry analysis resulted in the identification of the active phosphorylation sites at KDER  
426 and in the SWI3B protein (Supplemental Figure 13D, E). Interestingly three of four KDER-  
427 dependent phosphorylation sites were located in SWI3B in SWIRM and SANT domains  
428 (Supplemental Figure 13E, F), providing a valuable hint that the ERF family proteins may be  
429 responsible for the SWI3B phosphorylation.

430

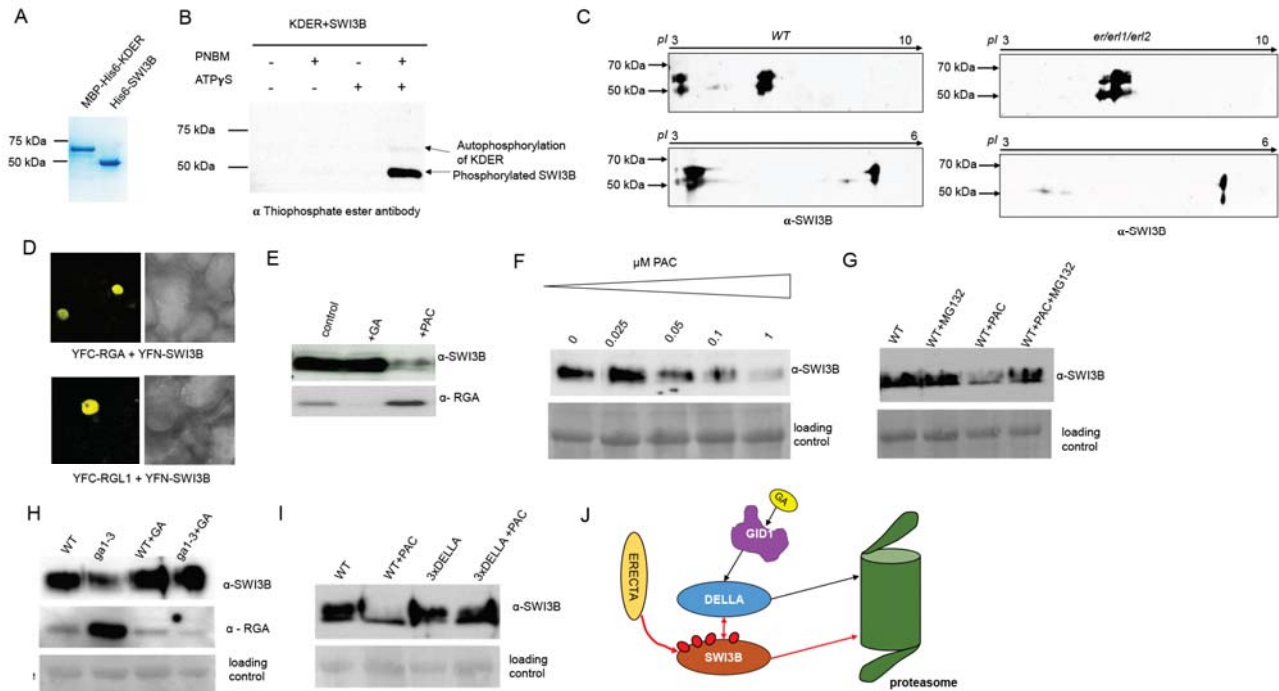

431  
 432 **Figure 5.** Erf proteins are responsible for the phosphorylation of SWI3B protein, while DELLA  
 433 proteins control SWI3B protein abundance (See also Figures S13, S14, and S15). A, Coomassie  
 434 staining of MBP-His6-KDER and His6-SWI3B proteins purified from bacteria. B, Western blot  
 435 with anti-Thiophosphate ester antibody (ab92570; Abcam) showing *in vitro* SWI3B  
 436 phosphorylation by KDER. C, 2D Western blot assay with anti SWI3B antibody indicating *in*  
 437 *in vivo* phosphorylation alteration of SWI3B protein in *er/er11/er12* mutant. D, SWI3B and RGA  
 438 and RGL1 proteins in the nuclei of living cells. Bimolecular Fluorescence Complementation  
 439 assay (BiFC) in epidermis of tobacco leaves. Scale bar = 10 $\mu$ m. E, The amounts of SWI3B and  
 440 RGA proteins in plants are oppositely regulated by PAC treatment. F, The disappearance of  
 441 SWI3B protein is PAC-dose dependent. G, The PAC-dependent degradation of SWI3B is  
 442 abolished by the MG132 treatment, a known proteasome inhibitor. H, The *gal-3* mutant  
 443 constitutively accumulating DELLA proteins exhibits the decreased level of SWI3B, which is  
 444 restored to WT levels upon GA treatment. I, The triple DELLA mutant exhibits a WT-like level  
 445 of SWI3B protein, and the PAC treatment does not influence SWI3B level in this background. J,  
 446 Schematic model highlighting Erf and DELLA impact on the SWI3B protein.

447

448 To verify this possibility the *in vivo* phosphorylation analysis using 2D-IEF-PAGE  
449 combined with the Western blot was performed. The alteration in the SWI3B proteins isoelectric  
450 point (*pI*) in *er/erl1/erl2* mutant was observed. The bands corresponding to phosphorylated  
451 SWI3B form were nearly absent in *er/erl1/erl2* plants, indicating a severe defect in SWI3B  
452 phosphorylation (Figure 5C). This data strongly supports the regulatory function of the ERF  
453 proteins on the SWI3B subunit of SWI/SNF CRC.

#### 454 455 **Accumulation of DELLA Proteins Correlates with Increased Proteasomal Degradation of** 456 **SWI3B**

457 Our previous study demonstrated that SWI3C, a partner of SWI3B, physically interacts  
458 with DELLA proteins (Sarnowska et al., 2013). We also found that the Arabidopsis lines with  
459 impaired SWI/SNF CRCs- *brm* and *swi3c* exhibit decreased level of bioactive GA<sub>4</sub> gibberellins  
460 level (Sarnowska et al., 2013; Archacki et al., 2013), but they do not accumulate RGA DELLA  
461 protein similarly as in case of *er/erl1/erl2* plants (Supplemental Figure 14 and Figure 1J). To  
462 address this unusual phenomenon, we used a BiFC assay to analyze the interaction between  
463 DELLA and SWI3B. The interaction between either RGA or RGL1 protein and SWI3B was  
464 found (Figure 5D, Supplemental Figure 15). No YFP signal was detected in control cells.

465 To understand the functional consequences of the detected interactions between SWI3B  
466 and DELLA proteins, we analyzed the amounts of SWI3B and RGA proteins in GA or PAC-  
467 treated plants (Figure 5E). Surprisingly, we observed the PAC-dose-dependent disappearance of  
468 SWI3B protein (Figure 5F). To check if the degradation of SWI3B under these conditions  
469 depended on the proteasome, we tested the effect of MG-132 on the SWI3B level. MG-132  
470 treatment caused increasing SWI3B abundance in PAC treated plants (Figure 5G), suggesting  
471 that the degradation of SWI3B observed in parallel to accumulation of DELLAs occurs *via* the  
472 proteasome. We also observed increased degradation of SWI3B in the *gal-3* mutant in which  
473 DELLA proteins are constitutively accumulated (Figure 5H), but we did not observe enhanced  
474 SWI3B degradation in PAC-treated 3xDELLA (Archacki et al., 2013) collectively suggesting  
475 that binding of SWI3B by DELLA proteins may be a primary cause of its proteasomal  
476 degradation (Figure 5I, J). Thus, the accumulation of DELLA proteins should lead to the same  
477 consequences as the elimination of SWI3B protein or SWI3B-containing SWI/SNF CRCs. This  
478 conclusion is strongly supported by the lack of RGA protein accumulation in GA deficient *brm*



479 and *swi3c* lines with inactivated other subunits of SWI/SNF CRC (Archacki et al., 2013;  
480 Sarnowska et al., 2013). Therefore, it could be indeed expected that GA and SWI3B-deficient  
481 *er/er11/er12* mutant will also not accumulate RGA protein because, in the case of SWI/SNF CRC  
482 impairment, the DELLA accumulation seems to be irrelevant. Collectively, our results provide  
483 new insight into the functioning of the ERECTA family proteins and DELLA proteins and their  
484 mutual impact on the SWI3B-containing SWI/SNF CRCs.

485

### 486 **Binding of ERECTA and SWI3B to Promoter Regions of the *GIDI* Genes**

487 The *er/er11/er12* mutant displays an impaired response to exogenous GA treatment and a  
488 consistently decreased expression of all three *GIDI* genes. ERf proteins interact with the SWI3B,  
489 inactivation of *ERf* proteins results in nucleosomal chromatin structure alterations and decreased  
490 abundance of SWI3B and its phosphorylated form in Arabidopsis, and there is an intriguing  
491 interdependence between the control of the SWI3B level and DELLA protein accumulation,  
492 therefore we examined if ER and the SWI3B participate in transcriptional control of the *GIDI*  
493 genes previously reported as targets for DELLA (Rosa et al., 2015). The ChIP analysis on *GIDI*  
494 promoters was performed using nuclei purified from 3-week-old seedlings expressing the ER-  
495 GFP and the SWI3B-HIS-STREP-HA proteins.

496 The binding of ER-GFP was detected around -130bp upstream of the TSS in the *GIDIa*  
497 promoter region while SWI3B bound around the TSS of the *GIDIa* promoter (Figure 6A). The  
498 ER protein was targeted to two regions around -150bp and -350bp from the TSS in the *GIDIb*  
499 promoter, SWI3B was localized only -350bp upstream TSS (Figure 6B). ER and SWI3B were  
500 similarly cross-linked to the -100bp region of the *GIDIc* promoter, but SWI3B was also mapped  
501 further upstream to -800bp (Figure 6C).

502

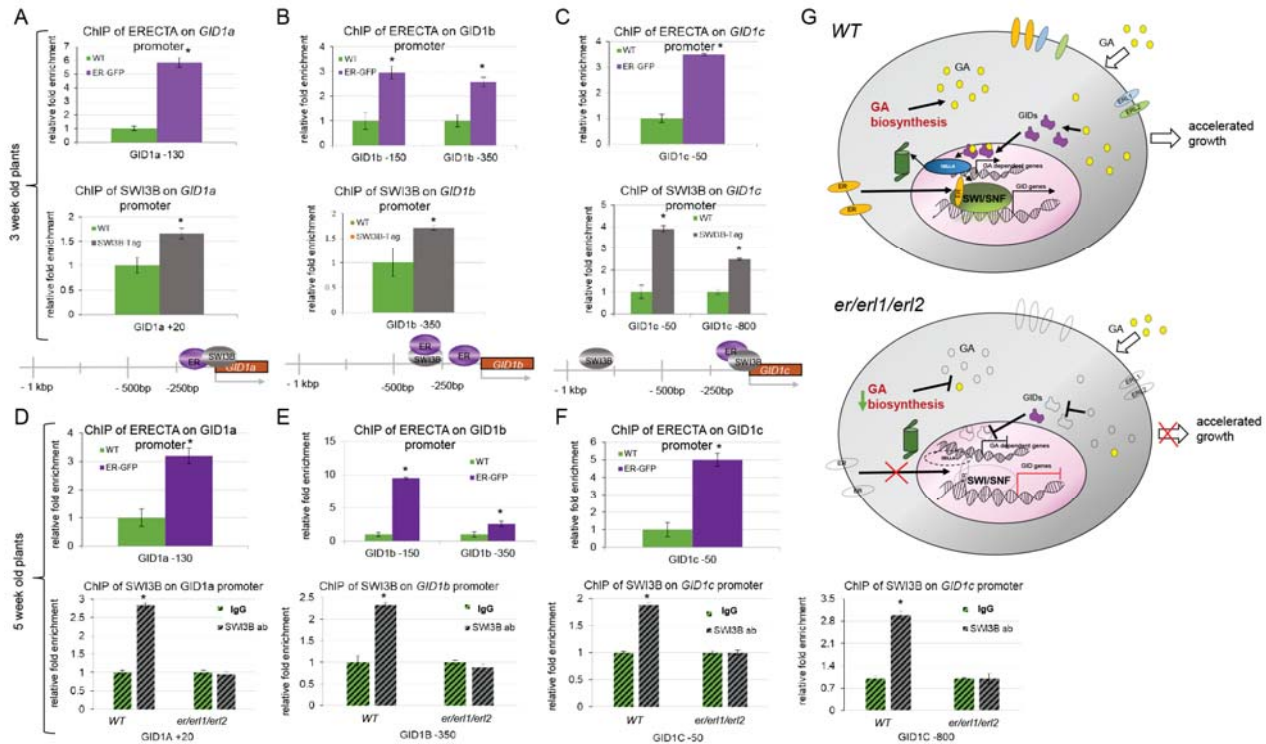

503  
 504 **Figure 6.** ERf proteins enter the nucleus where ERECTA protein binds the *GID1* promoters  
 505 similarly to the SWI3B subunit of SWI/SNF CRC (See also Figures S16 and S17). A, ERECTA  
 506 protein binds to promoter regions of the *GID1a* gene in a region targeted by the SWI/SNF  
 507 complex in three-week-old plants. (error bars refer to SD,  $P < 0.05$ , Student's *t*-test, three  
 508 biological and technical replicates were performed). B, ERECTA and SWI3B core subunit of  
 509 SWI/SNF CRCs target promoter regions of *GID1b* gene in three-weeks old plants (error bars  
 510 refer to SD,  $P < 0.05$ , Student's *t*-test, three biological and technical replicates were performed).  
 511 C, SWI3B binds to the promoter region of the *GID1c* gene in two different regions. One of them  
 512 is targeted by ERECTA protein in three-week-old plants. D, ERECTA protein binds to promoter  
 513 regions of the *GID1a* gene in a region targeted by the SWI/SNF complex in five-week-old plants.  
 514 (error bars refer to SD,  $P < 0.05$ , Student's *t*-test, three biological and technical replicates were  
 515 performed). E, ERECTA targets promoter region of *GID1b* gene in five-week-old plants (error  
 516 bars refer to SD,  $P < 0.05$ , Student's *t*-test, three biological and technical replicates were  
 517 performed). F, ERECTA binds to the promoter region of the *GID1c* gene in three-week-old  
 518 plants. The bottom panel in D-F: the binding of native SWI3B protein to its target sites in *GID1a*-  
 519 *c* promoter regions is abolished in 5-week-old *er/er1/erl2* triple mutant plants. G, A model  
 520 describing the non-canonical nuclear function of ERf proteins in the GA signaling pathway.



521  
522           Inspection of ER and SWI3B binding to the *GID1a-c* promoter regions in 5-week-old  
523 WT, ER-GFP, and the *er/erl1/erl2* mutant demonstrated that ER binds the same *GID1* promoter  
524 regions as in the case of 3-week-old plants (Figure 6 D-F). The SWI3B binding to the promoter  
525 of *GID1* genes was abolished by the inactivation of ERF proteins in *er/erl1/erl2* plants. The  
526 inactivation of *ER*, *ERL1*, or *ERL2* did not affect the binding of SWI3B to *GID1a-c* promoter  
527 regions in single *er105*, *erl1*, and *erl2* mutant lines (Supplemental Figure 16). Our study provides  
528 evidence that the three ERF proteins have redundant functions regarding proper SWI3B  
529 recruitment since only the simultaneous absence of all ERfs proteins abolished SWI3B binding to  
530 the *GID1a-c* promoters.

531           Of note, we found a similar binding of HER2 (EGFR-family) receptor and BAF155  
532 subunit of SWI/SNF CRCs to the promoter regions of human *BRCA1* and *FBP1* genes  
533 (Supplemental Figure 17), indicating that the phenomenon observed for ER may be a general  
534 mechanism controlling gene expression that is maintained between kingdoms.

535

## 536 **Discussion**

537 Inactivation of ERf LRR-RLK family members results in various defects in Arabidopsis  
538 growth and development. While it is well established that ERf proteins play distinct roles in the  
539 control of epidermal patterning, stomatal development, meristem size, inflorescence architecture,  
540 and hormonal signaling, the exact mechanisms underlying the regulatory functions of ERf  
541 proteins in these processes are largely unknown (*e.g.*, Chen and Shpak, 2014; Chen et al., 2013b;  
542 Qi et al., 2004; Van Zanten et al., 2010; Kosentka et al., 2019).

543 Here we show that the inactivation of Arabidopsis ERf proteins has a broad effect on  
544 various regulatory processes, including hormonal signaling, and suggest that these sum responses  
545 underlie the severe developmental defects exhibited by the *er/erl1/erl2* mutant. We demonstrate  
546 that parallel inactivation of all *ERf* proteins results in severe deregulation of the GA signaling  
547 pathway as evidenced by the impairment of GA perception and GA biosynthesis. When taken  
548 together, these findings, alongside the identification of NLS and NES sequences in ERf proteins  
549 and our demonstration of their translocation into the nucleus, suggest a novel, non-canonical  
550 function of ERf proteins (Figure 6G).

551 Our study also reveals an analogy of this system to the previously described XA21 LRR  
552 immune receptor in rice (Park and Ronald, 2012) and to the non-canonical signaling mode of the  
553 human Epidermal Growth Factor Receptor (EGFR) family (Lee et al., 2015a). Although it should  
554 be stressed that these two classes of plant and animal epidermal receptors carry completely  
555 unrelated sequences from one another and from the system we describe here (Supplemental Table  
556 3), suggesting that the translocation of the membrane receptors to the nucleus may be a general  
557 paradigm maintained between plant and animal kingdoms. In addition to their canonical  
558 membrane receptor functions, holoreceptor and truncated forms of EGFRs are imported into  
559 nuclei *via* ER-mediated retrograde transport, although some of them lack known NLSs (Chen and  
560 Hung, 2015).

561 In the nucleus, the EGFR receptors can bind to DNA, interact with various transcription  
562 factors. Thereby, nuclear forms of EGFRs are implicated in the control of cell proliferation, DNA  
563 replication and repair, and transcription (Chen and Hung, 2015), so their functions extend far  
564 beyond the regulation of epidermal patterning.

565 We found here that the Arabidopsis ERECTA LRR-RLK receptor similarly translocates  
566 from the plasma membrane into the nucleus. Both intact and N-terminally truncated forms of

567 ERECTA were detectable in the nucleus. A truncated ERECTA carrying only the kinase domain  
568 localizes exclusively in the nucleus and partially complements the leaf developmental defects  
569 caused by the *er-105* mutation implying a ligand-independent non-canonical signaling function of  
570 the ERECTA kinase domain.

571 Furthermore, our data show that the ERF proteins interact through their kinase domains  
572 with the SWI3B, and ER can phosphorylate the SWI3B core subunit of the SWI/SNF CRC.  
573 SWI/SNF plays a pivotal role in the hormonal crosstalk regulation in both humans and plants  
574 (Sarnowska et al., 2016). Moreover, we show that analogously as ER protein, the HER2 member  
575 of the EGFR family directly interacts with the BAF155 subunit of human SWI/SNF and co-  
576 localizes with BAF155 on some gene promoters providing evidences that such system is likely  
577 maintained between kingdoms.

578 Parallel inactivation of all ERF proteins results in alterations of genome-wide nucleosomal  
579 chromatin structure and altered transcriptional activity of a large number of genes. The binding of  
580 SWI3B to its target regions in the *GID1a-c* promoters is retained in *er-105*, *erl1*, and *erl2* single  
581 mutant lines. By contrast, the *er/erl1/erl2* mutant plants exhibited a reduction in phosphorylation  
582 SWI3B protein level and abolished proper SWI3B binding to *GID1* promoter regions together  
583 with decreased expression of *GID1a-c* genes, indicating a strong and direct effect of the ERF  
584 signaling pathway on SWI/SNF-dependent chromatin remodeling. The *er/erl1/erl2* mutant plants  
585 are characterized by a decreased level of endogenous gibberellins; however, they do not  
586 accumulate DELLA proteins, similar to the SWI/SNF mutants. Thus, we have demonstrated that  
587 the *er/erl1/erl2* mutant plants exhibit severe deregulation of the gibberellin signaling pathway  
588 and SWI/SNF-dependent chromatin remodeling. This is, in turn, an attractive explanation of the  
589 observed insensitivity of *er/erl1/erl2* mutant to the application of exogenous gibberellin. DELLA  
590 proteins are involved in the sequestration of various transcription factors and chromatin  
591 remodeling complexes (Phokas and Coates, 2021). In this study, we extend the existing  
592 knowledge on DELLA functioning by providing evidence for the existence of the DELLA-  
593 SWI3B regulatory module and explaining why some GA-deficient mutant lines with impaired  
594 SWI/SNF chromatin remodeling complex do not accumulate DELLA proteins (Figure 5G).

595 Collectively our finding that plant ERF proteins play an important, non-canonical nuclear  
596 function, *i.e.*, bind directly to chromatin and control the proper recruitment of SWI/SNF CRCs,  
597 which are strongly involved in controlling regulatory processes including hormonal crosstalk

598 (Sarnowska et al., 2016), may be a general paradigm for other classes of plant and mammalian  
599 membrane receptor kinases.

600

## 601 **Methods**

### 602 **Plant Material and Growth Conditions**

603 The *Arabidopsis thaliana* ecotype Columbia was used as wild type (WT) in all  
604 experiments. The following *Arabidopsis* mutants were used for analysis: *er-105*, *er-105/swi3b-3*  
605 (Sáez et al., 2008), *er/er11/er12* plants (Shpak et al., 2004) and *erf* lines in various combinations  
606 (Torii et al., 1996), the 35S::GFP *Arabidopsis* line has been obtained from NASC (N67775).  
607 Seeds were sown on soil or plated on ½ Murashige and Skoog medium (Sigma-Aldrich)  
608 containing 0.5% sucrose and 0.8% agar. Plants were grown under long day (LD) condition (12h  
609 Day/12h Night or 16h Day/8h Night). For GA response tests, plants were sprayed twice a week  
610 with 100 μM GA<sub>4+7</sub> or water (control) for a fast response the 2h of GA<sub>4+7</sub> treatment was  
611 performed.

### 612 **Construction of Transgenic Lines**

613 Genomic sequences of *ERECTA*, cDNAs of *ERECTA* kinase domain and truncated  
614 *ERECTA* lacking kinase domain (ERΔK) were cloned into binary vector p35S::GW::GFP (F.  
615 Turck, Max-Planck-Institut für Züchtungsforschung, in the case of *ERECTA*), and into pEarley  
616 Gate 101 (in the case of the ER kinase domain and ΔKDER; (Earley et al., 2006). Plants were  
617 transformed using *Agrobacterium tumefaciens* GV3101 (pMP90) by floral-dip method (Davis et  
618 al., 2009). The STOP codon of the *SWI3B* genomic sequence was replaced with HIS-STREP-HA  
619 using the recombineering method (Bitrián et al., 2011), moved into pCB1 vector (Heidstra et al.,  
620 2004), and transformed into *swi3b-2* *Arabidopsis* mutant line.

### 621 **RNA Extraction and qRT-PCR Analysis**

622 Total RNA was isolated from adult (5-week-old) plants using an RNeasy plant kit  
623 (Qiagen), treated with a TURBO DNA-free kit (Ambion). Total RNA (2.5μg) was reverse  
624 transcribed using a first-strand cDNA synthesis kit (Roche). qRT-PCR assays were performed  
625 with SYBR Green Master mix (Bio-Rad) and specific primers for PCR amplification.  
626 Housekeeping genes *PP2A* and *UBQ5* (AT1G13320 and AT3G62250, respectively) were used as  
627 controls. The relative transcript level of each gene was determined by the  $2^{-\Delta\Delta C_t}$  method  
628 (Schmittgen and Livak, 2008). Each experiment was performed using at least three independent  
629 biological replicates. qRT-PCR primers are listed in Supplemental Dataset 3.

### 630 **Transcript Profiling and Gene Ontology Analysis**

631 RNA was isolated from adult (5-week-old) WT and *er/erl1/erl2* plants using a Plant  
632 RNeasy kit (Qiagen) according to the manufacturer's protocol. Transcriptomes were analyzed  
633 using 150ng of total RNA as starting material. Targets were prepared with a cDNA synthesis kit  
634 followed by biotin labeling with the IVT labeling kit (GeneChip 39IVT Express; Affymetrix) and  
635 hybridized to the ATH1 gene chip for 16h as recommended by the supplier. The raw data were  
636 analyzed using GenespringGX according to the manual (guided workflow). GO-TermFinder was  
637 used for GO analyses of selected groups of genes (Boyle et al., 2004).

### 638 **Nuclear Fractionation**

639 Nuclei were isolated from 2g of leaves of 3-weeks old Arabidopsis seedlings according to  
640 the method previously described by Gaudino and Pikaard (1997). Subsequent nuclear  
641 fractionation was performed using the high-salt method, with modifications (Sarnowski et al.,  
642 2002).

### 643 **Protein Interaction Study, Confocal Imaging, Subcellular Localization, Brefeldin A and** 644 **Leptomycin B Treatment, DAPI Staining**

645 Protein interaction was analyzed by performing the immunoprecipitation of ER-GFP or  
646 KDER-YFP-HA from nuclei from 4 g of Arabidopsis plants (Saleh et al., 2008). The nuclear  
647 extracts were incubated with 25  $\mu$ L of GFP Magnetic Trap beads (Chromotek) according to  
648 manufactures instructions. The presence of SWI3B protein was determined by western blot  
649 analysis using anti-SWI3B antibody (Sarnowski et al., 2002).

650 The interaction between human proteins was analyzed by immunoprecipitation of HER2  
651 and BAF155 from viscolase treated nuclear extracts prepared, according to Jancewicz et al. 2021.  
652 The presence of HER2 and BAF155 was determined by Western blot analysis using anti HER2  
653 (CST, 12760) and anti BAF155 (CST, 11956) antibodies.

654 To obtain YFN-ERL1, YFC-ERL1, YFC-ERL2, and YFC-KDER fusions for BiFC (Hu et  
655 al., 2002) analysis, cDNAs encoding ERL1 and ERL2 proteins and ERECTA, ERL1, and ERL2  
656 C-terminal kinase domains were PCR amplified and cloned into the binary vectors pYFN43 or  
657 pYFC43 (Belda-Palaz3n et al., 2012). The *in vivo* interactions between proteins were detected by  
658 BiFC using Leica TCS SP2 AOBS, a laser scanning confocal microscope (Leica Microsystems).  
659 Tobacco (*Nicotiana benthamiana*) epidermal cells were infiltrated using *Agrobacterium*  
660 *tumefaciens* GV3101 (pMP90) carrying plasmids encoding ERL1, ERL2, or KDER fusions and  
661 the p19 helper vector and analyzed by confocal microscopy 3 d later. YFN-RFP and YFC-RFP

662 fusions were used to detect transformed cells in the BiFC assays (Sarnowska et al., 2013); at least  
663 five nuclei were analyzed in three separate experiments.

664 The vesicle trafficking inhibitor BFA (Sigma Aldrich) was used at the 25 $\mu$ M  
665 concentration at the following time points 40 min, 90 min, and 120 min. The NES-dependent  
666 nuclear export inhibitor Leptomycin B was used at the 200 nM concentration 4h before  
667 microscopy observation. Nuclei were stained with 4',6-diamidino-2-phenylindole (DAPI) at the  
668 1 $\mu$ g/mL concentration for 30 min. The observation was carried out on the root tip of about two  
669 weeks old plants incubated directly before in 1/2 MS alone or with the addition of proper  
670 compound (BFA or Leptomycin B, respectively). Every time 30 min before the end of  
671 incubation, DAPI was added.

### 672 **Chromatin Immunoprecipitation**

673 ChIP experiments were performed as described previously (Sacharowski et al., 2015) on  
674 three or five-week-old WT, ER-GFP, SWI3B-His-Strep-HA, and *er/er1/erl2* plants cross-linked  
675 under vacuum using formaldehyde (final concentration: 1%) and Bis-(sulfosuccinimidyl)  
676 glutarate (final concentration: 1mM). For ER-GFP, chromatin immunoprecipitation was  
677 performed with GFP-Trap M (Chromotek). For SWI3B ChIP experiments, NiNTA Agarose  
678 (Qiagen) or, in the case of anti-SWI3B antibody, the magnetic protein A and G dynabeads  
679 (Dynal) were used. ChIP enrichment was determined using qPCR, and relative fold change was  
680 calculated using the  $2^{-\Delta\Delta C_t}$  method (Schmittgen and Livak, 2008). The TA3 retrotransposon was  
681 used as negative control (Pastore et al., 2011). Primers used in ChIP experiments are listed in  
682 Supplemental Dataset 3.

683 Chromatin from the SKBR-3 human cell line was immunoprecipitated according to  
684 (Komata et al., 2014 and Jancewicz et al., 2021). Recovered chromatin was incubated O/N at 4°C  
685 with the following antibodies: anti BAF155 (CST, 11956), antiHER2 (CST, 12760), and Normal  
686 Rabbit IgG (CST, 2729, mock control). Results were calculated based on the  $2^{-\Delta\Delta C_t}$  (Schmittgen  
687 and Livak, 2008). The relative fold enrichment of the analyzed sample represents the fold change  
688 with reference to IgG (mock) sample. A set of primers used for ChIP-qPCR analysis is listed in  
689 Supplementary Dataset 3.

### 690 **MNase Mapping of Genome-wide Nucleosome Positioning and MNase-qPCR**



691 The nuclear extraction, MNase treatment, subsequent NGS analyses, and confirmatory  
692 MNase-qPCR were performed according to (Sacharowski et al., 2015) on 5 week old plant  
693 material.

#### 694 **Gibberellin Analysis**

695 About 200 mg of frozen materials from 5 week old plants were used to extract and purify the GA  
696 as described in Plackett et al. (2012) with minor modifications. GA was quantified using MS/MS  
697 analysis using 4000 Triple Quad (AB Sciex Germany GmbH, Darmstadt, Germany) in multiple  
698 reaction monitoring (MRM) scan with electrospray ionization (ESI) as described in Salem et al.,  
699 (2016). The mass spectrometry attached to UPLC system (e.g., Waters Acquity UPLC system,  
700 Waters, Machester, UK) separation was achieved on a reversed phase C18-column (100 mm ×  
701 2.1 mm 1.8 μm).

#### 702 ***In vitro* Phosphorylation Analysis and *in vivo* Kinase Assay**

703 SWI3B-6xHis was overexpressed and purified, according to Sarnowski et al. (2002). The  
704 KDER (pDEST-6xHis-MBP vector) was purified using tandem purification using MBP and Ni-  
705 NTA resins. *In vitro* kinase assay was performed according to the method described by (Allen et  
706 al., 2007). Phosphorylation was detected by Western blot analysis using an anti-Thiophosphate  
707 ester antibody (ab92570; Abcam) and by the MS/MS analysis.

708 *In vivo* phosphorylation analysis was performed using a 2D western blot assay on nuclear  
709 extracts from 5 weeks old WT and *er/er1/er2* plants (Saleh et al., 2008). For isoelectrofocusing  
710 (IEF), nuclear proteins were prepared according to Kubala et al. (2015). The IEF was performed  
711 on the 7cm length gel strips with immobilized pH gradients 3-10 and 3-6 (BioRad). After IEF,  
712 the equilibration of immobilized pH gradient was performed according to Wojtyla et al. (2013).  
713 The SWI3B protein was detected by Western blotting using an anti SWI3B antibody (Sarnowski  
714 et al., 2002). The *in vivo* phosphorylation was identified based on the changes of SWI3B  
715 isoelectric point (*pI*) (Mayer et al., 2015).

#### 716 **Accession Numbers**

717 Microarray and MNase-seq data are available in the ArrayExpress database  
718 ([www.ebi.ac.uk/arrayexpress](http://www.ebi.ac.uk/arrayexpress)) under E-MTAB-5595 and E-MTAB-5830 accession numbers,  
719 respectively.

720



721 **Supplemental Data**

722  
723  
724 **Supplemental Figure 1.** Comparative analysis of genes with altered expression in *er/er11/erl2*  
725 and *gal-3* mutants. A, Combinations of *erf* mutants have distinct effects on height of Arabidopsis  
726 plants. Error bars refer to SD,\* =  $P < 0.05$ , Student's *t* test. B, Genes showing altered expression  
727 in the *er/er11/erl2* mutant plants. C, Venn diagrams indicating genes contrastingly up-regulated in  
728 *er/er11/erl2* and down-regulated in *gal-3* plants. D, Venn diagrams indicating genes contrastingly  
729 down-regulated in *er/er11/erl2* and up-regulated in *gal-3* plants. E, ERF proteins control the  
730 expression of genes down-regulated in *gal-3*, which are either DELLA repressed or DELLA  
731 independent. F, ERF proteins control the expression of genes up-regulated in *gal-3*, which are  
732 either DELLA activated or DELLA independent.

733  
734 **Supplemental Figure 2.** The *er/er11/erl2* mutant displays severely impaired response to  
735 exogenous GA treatment and slightly enhance *gal-3* phenotypic traits. A, The 14 days old  
736 *er/er11/erl2* plants treated with GA<sub>4+7</sub> did not show rosette expansion indicating defects in GA  
737 response. Error bars refer to SD,\* =  $P < 0.05$ , Student's *t* test, n= 30 plants. B, Two-month-old  
738 GA<sub>4+7</sub> treated *er/er11/erl2* plants show accelerated flowering compared to mock treated control.  
739 Scale bar= 1cm. n= 30 plants. C, Two-months old *er/er11/erl2* plants. Scale bar= 1cm. n= 30  
740 plants. D, Three-weeks old *gal-3* plants crossed with *erf* mutants in various combinations show  
741 mostly the phenotypic traits characteristic for *gal-3*. Scale bar= 1 cm. E, The phenotypic traits of  
742 5-weeks old plants carrying *erf* mutations crossed with *gal-3* in various combinations grown in  
743 long day conditions. Scale bar= 1 cm.

744  
745 **Supplemental Figure 3.** *er/er11/erl2* plants exhibit deficiency in gibberellin intermediates.  
746 Left panel: *er/er11/erl2* mutant exhibits dramatically reduced level of GA<sub>12</sub> and GA<sub>24</sub> gibberellin  
747 intermediates (error bars-SD,  $P < 0.05$ , Student's *t*-test, three biological and technical replicates  
748 were assayed). Right panel: schematic representation of alteration in GA biosynthesis pathway in  
749 *er/er11/erl2* plants.

750  
751 **Supplemental Figure 4.** 35S::ERECTA-GFP construct complements the *er-105* mutation.

752

753 **Supplemental Figure 5.** ERECTA protein is detected in various cell compartments including  
754 endosomes and accumulate in the nuclei periphery after BFA treatment. A, In cell pairs of  
755 stomata, ERECTA-GFP was detected in circles around the positions of nuclei. Scale bar=10 $\mu$ m.  
756 B, Accumulation of ERECTA protein in the BFA bodies after Brefeldin A treatment. Note the  
757 enhanced presence of BFA bodies after 40 min (mid column) and 90 min (right column) BFA  
758 treatment. Scale bar=10 $\mu$ m.

759  
760 **Supplemental Figure 6.** The ERL1 and ERL2 proteins carry defined NLS in their kinase  
761 domains. A, The NLS prediction in the kinase domain of ERL1 and ERL2 proteins has been done  
762 using cNLS mapper (Kosugi et al., 2009a; Kosugi et al., 2009b). NLS score in range 5-7 means  
763 that protein is partially localized in the nucleus and cytoplasm. Bottom panel: The alignment of  
764 ERECTA, ERL1, and ERL2 protein sequences (part of kinase domains carrying NLS) using  
765 PRALINE indicates high amino-acid sequence conservation between analyzed proteins.  
766 Consistency is determined within range 1-10, where 1 means least conserved substitution and 10-  
767 the most conserved substitution (Simossis et al., 2005). B, Western blot analysis with anti-GFP  
768 antibody confirms nuclear localization of ERECTA protein which undergoes proteolytic  
769 processing. The samples were standardized by western blotting with anti H3 antibody. C,  
770 Schematic presentation of full length and deletion variants of ERECTA protein used for the  
771 localization study. ER – ERECTA protein with complete amino acids sequence;  $\Delta$ KDER –  
772 truncated ERECTA protein lacking kinase domain; KDER – the kinase domain of ERECTA  
773 protein.

774  
775 **Supplemental Figure 7.** The kinase domain of ERECTA (KDER) has ability to complement the  
776 *er-105* leaf phenotypic traits. A, Rosette leaves of WT (upper), *er-105* (mid), and *er-105*/KDER-  
777 YFP (lower panel). Graphical alignment of corresponding leaves indicating partial  
778 complementation of *er* phenotypic traits by KDER. Scale bar= 1cm. B, Cauline leaves of WT  
779 (upper), *er-105* (mid), and *er-105*/KDER-YFP (lower panel). Graphical alignment of  
780 corresponding laves indicating partial complementation of *er* phenotypic traits by KDER. Scale  
781 bar= 1cm. C, The kinase domain of ERECTA cannot restore all (i.e., stem elongation) phenotypic  
782 traits of the *er-105* mutant line. Scale bar= 1cm.

783

784 **Supplemental Figure 8.** ERECTA protein enters to the nucleus and localizes in various sub-  
785 nuclear fractions.

786

787 **Supplemental Figure 9.** Negative controls for bimolecular fluorescence complementation assay.  
788 Negative controls for BiFC interaction analysis of ER, ERL1, ERL2 kinase domains fused to  
789 YFC and SWI3B fused to YFN, including the RFP channel. Scale bar 10  $\mu$ m.

790

791 **Supplemental Figure 10.** Human SWI3-type BAF155 co-precipitates with HER2 EGFR family  
792 membrane receptor from human cells nuclei.

793

794 **Supplemental Figure 11.** *er/erl1/erl2* mutant plants show affected chromatin organization  
795 demonstrated as altered chromocenters number.

796 Upper panel: exemplary pictures of WT and *er/erl1/erl2* nuclei.

797 Lower panel: calculation of chromocenters (n=20 nuclei for each genotype).

798

799 **Supplemental Figure 12.** ERF proteins inactivation has a severe impact on genome-wide  
800 nucleosome positioning. A, Nucleosome changes identified in the *er/erl1/erl2* triple mutant  
801 plants. B, Genome-wide nucleosome distribution patterns surrounding the transcription start site  
802 (TSS). C, Nucleosome distribution patterns surrounding the TSS of GA-related genes showing  
803 altered expression in the *er/erl1/erl2* triple mutant plants. D, The alteration of nucleosomal  
804 structure on *PRE1*, *GID1a*, and *GID1b* loci misexpressed in the *er/erl1/erl2* triple mutant plants  
805 and targeted by the SWI/SNF CRC. Red boxes indicate nucleosome alterations. E, Confirmatory  
806 MNase-qPCR for selected genes with altered nucleosomes.

807

808 **Supplemental Figure 13.** Kinase domain of ERECTA phosphorylates SWI3B protein. A,  
809 Western blot with anti His6 antibody for detection of MBP-His6-KDER and His6-SWI3B  
810 proteins purified from bacteria. B, Western blot with anti-Thiophosphate ester antibody  
811 indicating no phosphorylation of SWI3B protein in the absence of KDER (negative control). C,  
812 Western blot with anti-Thiophosphate ester antibody (ab92570; Abcam) showing  
813 autophosphorylation of KDER in the absence of SWI3B protein. D, Identification of active  
814 phosphorylation sites in KDER by MS/MS analysis. E, Identification of active phosphorylation

815 sites in SWI3B by MS/MS analysis. F, KDER phosphorylates SWI3B at the SWIRM and SANT  
816 domains.

817  
818 **Supplemental Figure 14.** GA-deficient mutant lines with inactivated subunits of SWI/SNF  
819 complexes do not accumulate RGA DELLA protein. A, GA-deficient *swi3c* plants are unable to  
820 over accumulate RGA protein. B, GA-deficient *brm* plants are unable to over accumulate RGA  
821 protein.

822  
823 **Supplemental Figure 15.** Negative controls for bimolecular fluorescence complementation  
824 assay.

825 Negative controls for BiFC interaction analysis of SWI3B, RGA, and RGL1 fused to YFC, and  
826 SWI3B fused to YFN, including the RFP channel. Scale bar 10  $\mu$ m.

827  
828 **Supplemental Figure 16.** Proper SWI3B binding to *GID1a-c* promoter regions is abolished in  
829 the *er/erl1/erl2* whereas occurs in single *er-105*, *erl1* or *erl2* mutant lines. A, SWI3B targets  
830 promoter region of *GID1a* gene in five-weeks old plants WT, *er-105*, *erl1* or *erl2* but is abolished  
831 in triple *er/erl1/erl2* mutant plants (error bars refer to SD,  $P < 0.05$ , Student's t test, three  
832 biological and technical replicates were used). B, SWI3B targets promoter region of *GID1b* gene  
833 in five-weeks old plants WT, *er-105*, *erl1* or *erl2* but is abolished in triple *er/erl1/erl2* mutant  
834 plants (error bars refer to SD,  $P < 0.05$ , Student's t test, three biological and technical replicates  
835 were used). C, SWI3B targets promoter region of *GID1c* gene in five-weeks old plants WT, *er-*  
836 *105*, *erl1* or *erl2* but is abolished in triple *er/erl1/erl2* mutant plants (error bars refer to SD,  $P <$   
837  $0.05$ , Student's t test, three biological and technical replicates were used).

838  
839 **Supplemental Figure 17.** Human SWI3-type BAF155 targets together with HER2 EGFR family  
840 membrane receptor *FBP1* and *BRCA1* genes *loci*. A, BAF155 subunit of human SWI/SNF  
841 complex binds *Fructose-1,6-Bisphosphatase locus* together with HER2 member of EGFR  
842 membrane receptor family. B, BAF155 subunit of human SWI/SNF complex binds *BRCA1 locus*  
843 together with HER2 member of EGFR membrane receptor family.

844

845 **Supplemental Table 1.** Genes classified to “Response to Gibberellin” GO term and showing  
846 down-regulated expression level in the *er/erl1/erl2* mutant.

847  
848 **Supplemental Table 2.** Genes with up-regulated expression in *er/erl1/erl2* mutant plants  
849 classified to GO-terms of leaf epidermal and stomatal cell differentiation.

850  
851 **Supplemental Table 3.** Functional analogies between arabidopsis ERF proteins and the human  
852 EGFR membrane receptors.

853  
854 **Supplemental dataset 1.** Comparative analysis of transcript profiling and MNase-seq data.

855 **Sub-table 1.** Transcript profiling using ATH1 microarray analysis to identify genes down-  
856 regulated in *er/erl1/erl2* mutant line.

857 **Sub-table 2.** Transcript profiling using ATH1 microarray analysis to identify genes up-regulated  
858 in *er/erl1/erl2* mutant line.

859 **Sub-table 3.** GO analysis of genes down-regulated in *er/erl1/erl2* mutant line.

860 **Sub-table 4.** GO analysis of genes up-regulated in *er/erl1/erl2* mutant line.

861 **Sub-table 5.** Comparative transcript profiling analysis for genes down-regulated in *er/erl1/erl2*  
862 and *gal-3* mutants lines.

863 **Sub-table 6.** GO analysis of *er/erl1/erl2* and *gal-3* down-regulated genes.

864 **Sub-table 7.** Comparative transcript profiling analysis for genes up-regulated in *er/erl1/erl2* and  
865 *gal-3* mutants lines.

866 **Sub-table 8.** GO analysis of genes up-regulated in *gal-3* and *er/erl1/erl2*.

867 **Sub-table 9.** Genes with altered nucleosome positioning in promoter region -3000 to TSS.

868 **Sub-table 10.** GO analysis of genes with altered nucleosome positioning identified in promoter  
869 region -3000 to TSS.

870 **Sub-table 11.** Genes with altered nucleosome positioning identified in promoter region -3000 to  
871 TSS and down-regulated in *er/erl1/erl2* microarray.

872 **Sub-table 12.** Genes with altered nucleosome positioning identified in promoter region -3000 to  
873 TSS and up-regulated in *er/erl1/erl2* microarray.

874 **Sub-table 13.** GO analysis for genes with altered nucleosome positioning identified in promoter  
875 region -3000 to TSS and down-regulated in *er/erl1/erl2* microarray.

876 **Sub-table 14.** GO analysis for genes with altered nucleosome positioning identified in promoter  
877 region -3000 to TSS and up-regulated in *er/erl1/erl2* microarray.

878

879 **Supplemental dataset 2.** Comparison of ER, ERL1, and ERL2 protein sequences with  
880 highlighted important domains including NLS.

881 ClustalW was used to align ER, ERL1, and ERL2 sequences. Under conserved amino acid is  
882 asterisk mark, highly similar or similar amino-acids are marked :: and . respectively. LRR domain  
883 is marked as gray background, amino-acids crucial for EPFs or TMM interaction are indicated  
884 with bold. Transmembrane domain, juxtamembrane domain, and kinase domain are indicated  
885 with bold green, orange, and blue color fonts, respectively (Kosentka et al., 2017). The predicted  
886 NLS sequence is marked in a dotted line frame (Kosugi et al., 2009b).

887  
888 **Supplemental Dataset 3.** Primers used in this work.

889 **Supplemental Movie 1. The ERECTA protein undergoes endocytosis.**

890 **Supplemental Movie 2. The ERECTA protein undergoes endocytosis.**

891

892 **Acknowledgements**

893 We thank Csaba Koncz for critical comments during manuscript construction, Dorota Zugaj for  
894 assistance in plant cultivation, Iga Jancewicz for assistance in leptomycin B assay, Claus  
895 Schwechheimer for providing the anti-RGA antibody, Mohammad-Reza Hajirezaei for help with  
896 GA measurements and the Max Planck-Genome-Center Cologne  
897 (<http://mpgc.mpipz.mpg.de/home/>) for performing the transcript profiling and MNase-seq  
898 analysis described in this study.

899



900 **FIGURE LEGENDS**

901 **Figure 1.** *ERf* inactivation affects Arabidopsis development, causes transcriptomic changes  
902 overlapping with the effect of *gal-3* mutation and impairs GA biosynthesis and signaling (See  
903 also Figures S1, S2 and S3). A, Phenotypic changes conferred by combinations of *erf* mutations.  
904 Scale bar= 1 cm. B, Overlapping down-regulated genes in *er/er11/erl2* and *gal-3* plants. C,  
905 Overlapping up-regulated genes in *er/er11/erl2* and *gal-3* plants. D, The *er/er11/erl2* plants  
906 exhibit impaired GA response. 14- days old LD (12h day/12 night) grown WT and *er/er11/erl2*,  
907 sprayed twice a week with water (upper row) or 100 $\mu$ M GA<sub>4+7</sub> (lower row). Arrows-*er/er11/erl2*  
908 plants. Scale bar= 1cm. E, The GA response is retained to various levels in combinations of *erf*  
909 mutants. Error bars-SD,\* =P < 0.05, Student's *t*-test, n= 30 plants. F, The response of various *erf*  
910 mutants to 1 $\mu$ M Paclobutrazol treatment. Error bars-SD,\* =P < 0.05, Student's *t* test, n= 30  
911 plants. G, The *er/er11/erl2* mutant exhibits altered transcription of *GID1* GA receptor genes (error  
912 bars-SD, P < 0.05, Student's *t*-test, three biological and technical replicates were assayed). H,  
913 The *er/er11/erl2* mutant displays altered GA biosynthesis and metabolism-related genes  
914 expression (error bars-SD, P < 0.05, Student's *t*-test, three biological and technical replicates  
915 were assayed). I, The *er/er11/erl2* mutant exhibits dramatically reduced level of bioactive GA<sub>4+7</sub>  
916 gibberellin (error bars-SD, P < 0.05, Student's *t*-test, three biological and technical replicates  
917 were assayed). J, The *er/er11/erl2* mutant shows decreased level of the DELLA protein RGA.

918  
919 **Figure 2.** Subcellular localization of ERECTA protein (See also Figures S4 and S5). A,  
920 ERECTA is localized in plasma-membrane and endosomes in epidermal cells of 7-days old  
921 seedlings. ER-GFP, or free GFP visualized using GFP channel. FM4-64 specifically stains  
922 plasma-membranes. Scale bar=10 $\mu$ m. B, Root-tip images of approximately two-week-old (14-17  
923 days) ER-GFP seedlings showing nuclear localization of ERECTA protein at considerable  
924 frequency. C, Root-tip images of 12-day-old ER-GFP seedlings serving as the control for D and  
925 E. D, Brefeldin A treatment enhanced the localization of ERECTA protein in Brefeldin A (BFA)  
926 bodies. Roots of 12-day-old Arabidopsis seedlings. E, Leptomycin B treatment enhanced the  
927 nuclear localization of ERECTA Free GFP was used as a control in C, D, and E, cell nuclei were  
928 stained with DAPI, scale bar= 50 $\mu$ m. F, Letomycin B enhances nuclear presence of ER protein.  
929 The GFP/DAPI ratio calculated per area for roots of plants expressing ER-GFP protein.

930



931 **Figure 3.** Nuclear function of ERf proteins (See also Figures S6, S7, S8, S9, and S10). A, Root-  
932 tip images of approximately two-week-old (14-17 days) plants expressing ER-GFP, KDER-YFP-  
933 HA (the kinase domain of the ER protein), ER $\Delta$ K-YFPHA (truncated ER protein lacking the  
934 kinase domain) proteins indicating that the kinase domain is necessary for the nuclear localization  
935 of ER protein. WT and GFP expressing plants-negative controls. Panel 2 in the ER-GFP indicates  
936 nuclear localization of ER protein appearing at considerable frequency. Cell nuclei were stained  
937 with DAPI. Scale bar=25  $\mu$ m. B, The *er-105/swi3b3* double mutant shows more retarded growth  
938 than either *er-105* or *swi3b3* plants. Scale bar= 1cm. C, The *er/er11/erl2* triple mutant exhibits  
939 reduced SWI3B protein level. D, ER-GFP or free GFP (negative control) pull-down from the  
940 nucleus and anti-SWI3B western blotting indicate a specific ER-SWI3B interaction. E,  
941 Immunoprecipitation of KDER-YFP-HA from the nucleus indicated that the kinase domain of  
942 ER interacts with SWI3B. F, ER, ERL1, and ERL2 kinase domains interact with SWI3B in the  
943 nucleus. Bimolecular Fluorescence Complementation assay (BiFC) in epidermis of tobacco  
944 leaves. Scale bar = 10 $\mu$ m.

945  
946 **Figure 4.** ER and *SWI3B* interact genetically and affect both GA biosynthesis and response  
947 pathways (See also Figures S11 and S12). A, The *er-105/swi3b-3* double mutant exhibits more  
948 retarded growth than the *er-105* and *swi3b-3* (three-weeks old plants). Graphical alignment of  
949 corresponding leaves. Scale bar= 1 cm. B, The hypersensitivity of 1-week-old *swi3b-3* hypocotyl  
950 to GA treatment is abolished by introducing *er-105*. C, Roots of all tested 1-week-old genotypes  
951 similarly respond to PAC treatment (error bars-SD, \*P < 0.01,\*\* P < 0.001, \*\*\*P<0.0001,  
952 Student's *t*-test). D, Hypocotyls of all tested 1-week-old genotypes similarly respond to PAC  
953 treatment, right panel- hypocotyl length comparison for PAC treated plants only (error bars-SD,  
954 \*P < 0.01,\*\* P < 0.001, \*\*\*P<0.0001 Student's *t*-test). E, *swi3b-3* weak, point mutant line and  
955 *er-105/swi3b-3* exhibit elevated *SWI3B* transcript level, the *SWI3B* expression is elevated after  
956 supplementation with bioactive GA<sub>4+7</sub> in all genotypes except *swi3b-3* (error bars-SD, P < 0.05,  
957 Student's *t*-test). F, The examination of *GID1* genes indicated that almost all examined lines  
958 responded to GA treatment, but the *swi3b-3* line was insensitive for GA-induced transcriptional  
959 changes (error bars-SD, P < 0.05, Student's *t*-test). G, The examination of GA biosynthesis genes  
960 indicated that almost all examined lines responded to GA treatment, but the *swi3b-3* line was

961 insensitive for GA-induced transcriptional changes except *GA20ox2* expression (error bars-SD, P  
962 < 0.05, Student's *t*-test).

963  
964 **Figure 5.** ERF proteins are responsible for the phosphorylation of SWI3B protein, while DELLA  
965 proteins control SWI3B protein abundance (See also Figures S13, S14, and S15). A, Coomassie  
966 staining of MBP-His6-KDER and His6-SWI3B proteins purified from bacteria. B, Western blot  
967 with anti-Thiophosphate ester antibody (ab92570; Abcam) showing *in vitro* SWI3B  
968 phosphorylation by KDER. C, 2D Western blot assay with anti SWI3B antibody indicating *in*  
969 *vivo* phosphorylation alteration of SWI3B protein in *er/erl1/erl2* mutant. D, SWI3B and RGA  
970 and RGL1 proteins in the nuclei of living cells. Bimolecular Fluorescence Complementation  
971 assay (BiFC) in epidermis of tobacco leaves. Scale bar = 10 $\mu$ m. E, The amounts of SWI3B and  
972 RGA proteins in plants are oppositely regulated by PAC treatment. F, The disappearance of  
973 SWI3B protein is PAC-dose dependent. G, The PAC-dependent degradation of SWI3B is  
974 abolished by the MG132 treatment, a known proteasome inhibitor. H, The *gal-3* mutant  
975 constitutively accumulating DELLA proteins exhibits the decreased level of SWI3B, which is  
976 restored to WT levels upon GA treatment. I, The triple DELLA mutant exhibits a WT-like level  
977 of SWI3B protein, and the PAC treatment does not influence SWI3B level in this background. J,  
978 Schematic model highlighting ERF and DELLA impact on the SWI3B protein.

979  
980 **Figure 6.** ERF proteins enter the nucleus where ERECTA protein binds the *GID1* promoters  
981 similarly to the SWI3B subunit of SWI/SNF CRC (See also Figures S16 and S17). A, ERECTA  
982 protein binds to promoter regions of the *GID1a* gene in a region targeted by the SWI/SNF  
983 complex in three-week-old plants. (error bars refer to SD, P < 0.05, Student's *t*-test, three  
984 biological and technical replicates were performed). B, ERECTA and SWI3B core subunit of  
985 SWI/SNF CRCs target promoter regions of *GID1b* gene in three-weeks old plants (error bars  
986 refer to SD, P < 0.05, Student's *t*-test, three biological and technical replicates were performed).  
987 C, SWI3B binds to the promoter region of the *GID1c* gene in two different regions. One of them  
988 is targeted by ERECTA protein in three-week-old plants. D, ERECTA protein binds to promoter  
989 regions of the *GID1a* gene in a region targeted by the SWI/SNF complex in five-week-old plants.  
990 (error bars refer to SD, P < 0.05, Student's *t*-test, three biological and technical replicates were  
991 performed). E, ERECTA targets promoter region of *GID1b* gene in five-week-old plants (error

992 bars refer to SD,  $P < 0.05$ , Student's *t*-test, three biological and technical replicates were  
993 performed). F, ERECTA binds to the promoter region of the *GID1c* gene in three-week-old  
994 plants. The bottom panel in D-F: the binding of native SWI3B protein to its target sites in *GID1a-*  
995 *c* promoter regions is abolished in 5-week-old *er/er11/er12* triple mutant plants. G, A model  
996 describing the non-canonical nuclear function of ERF proteins in the GA signaling pathway.  
997

998 **References**

- 999
- 1000 **Allen JJ, Li M, Brinkworth CS, Paulson JL, Wang D, Hübner A, Chou W-H, Davis RJ,**  
1001 **Burlingame AL, Messing RO, et al** (2007) A semisynthetic epitope for kinase substrates.  
1002 *Nat Methods* 2007 46 **4**: 511–516
- 1003 **Archacki R, Buszewicz D, Sarnowski TJ, Sarnowska E, Rolicka AT, Tohge T, Fernie AR,**  
1004 **Jikumaru Y, Kotlinski M, Iwanicka-Nowicka R, et al** (2013) BRAHMA ATPase of the  
1005 SWI/SNF Chromatin Remodeling Complex Acts as a Positive Regulator of Gibberellin-  
1006 Mediated Responses in Arabidopsis. *PLoS One* **8**: e58588
- 1007 **Archacki R, Yatusевич R, Buszewicz D, Krzyczmonik K, Patryn J, Iwanicka-Nowicka R,**  
1008 **Biecek P, Wilczynski B, Koblowska M, Jerzmanowski A, et al** (2016) Arabidopsis  
1009 SWI/SNF chromatin remodeling complex binds both promoters and terminators to regulate  
1010 gene expression. *Nucleic Acids Res* **45**: 3116–3129
- 1011 **Belda-Palazón B, Ruiz L, Martí E, Tárraga S, Tiburcio AF, Culiáñez F, Farràs R, Carrasco**  
1012 **P, Ferrando A** (2012) Aminopropyltransferases Involved in Polyamine Biosynthesis  
1013 Localize Preferentially in the Nucleus of Plant Cells. *PLoS One*. doi:  
1014 10.1371/journal.pone.0046907
- 1015 **Bitrián M, Roodbarkelari F, Horváth M, Koncz C** (2011) BAC-recombineering for studying  
1016 plant gene regulation: Developmental control and cellular localization of SnRK1 kinase  
1017 subunits. *Plant J* **65**: 829–842
- 1018 **Bogdan S, Klämbt C** (2001) Epidermal growth factor receptor signaling. *Curr Biol* **11**: R292–  
1019 R295
- 1020 **Boyle EI, Weng S, Gollub J, Jin H, Botstein D, Cherry JM, Sherlock G** (2004)  
1021 GO::TermFinder - Open source software for accessing Gene Ontology information and  
1022 finding significantly enriched Gene Ontology terms associated with a list of genes.  
1023 *Bioinformatics* **20**: 3710–3715
- 1024 **Cai H, Huang Y, Chen F, Liu L, Chai M, Zhang M, Yan M, Aslam M, He Q, Qin Y** (2021)  
1025 ERECTA signaling regulates plant immune responses via chromatin-mediated promotion of  
1026 WRKY33 binding to target genes. *New Phytol* **230**: 737–756
- 1027 **Cai H, Zhao L, Wang L, Zhang M, Su Z, Cheng Y, Zhao H, Qin Y** (2017) ERECTA  
1028 signaling controls Arabidopsis inflorescence architecture through chromatin-mediated

- 1029 activation of PRE1 expression. *New Phytol* **214**: 1579–1596
- 1030 **Cao D, Cheng H, Wu W, Soo HM, Peng J** (2006) Gibberellin mobilizes distinct DELLA-  
1031 dependent transcriptomes to regulate seed germination and floral development in  
1032 *Arabidopsis*. *PLANT Physiol* **142**: 509–525
- 1033 **Casalini P, Iorio M V., Galmozzi E, Ménard S** (2004) Role of HER receptors family in  
1034 development and differentiation. *J Cell Physiol* **200**: 343–350
- 1035 **Chen M-K, Wilson RL, Palme K, Ditengou FA, Shpak ED** (2013) ERECTA Family Genes  
1036 Regulate Auxin Transport in the Shoot Apical Meristem and Forming Leaf Primordia. *Plant*  
1037 *Physiol* **162**: 1978–1991
- 1038 **Chen MK, Hung MC** (2015) Proteolytic cleavage, trafficking, and functions of nuclear receptor  
1039 tyrosine kinases. *FEBS J* **282**: 3693–3721
- 1040 **Chen MK, Shpak ED** (2014) ERECTA family genes regulate development of cotyledons during  
1041 embryogenesis. *FEBS Lett* **588**: 3912–3917
- 1042 **Chenlong Li, Gu L, Gao Lei, Chen C, Wei CQ, Qiu Q, Chien CW, Wang S, Jiang L, Ai LF,**  
1043 **Chen CY, Yang S, Nguyen V, Qi Y, Snyder MP, Burlingame AL, Kohalmi SE, Huang**  
1044 **S, Cao X, Wang ZY, Wu K, Chen X CY** (2016) Concerted genomic targeting of H3K27  
1045 demethylase REF6 and chromatin-remodeling ATPase BRM in *Arabidopsis*. *Nat Genet* **48**:  
1046 687–693
- 1047 **la Cour T, Kiemer L, Mølgaard A, Gupta R, Skriver K, Brunak S** (2004) Analysis and  
1048 prediction of leucine-rich nuclear export signals. *Protein Eng Des Sel* **17**: 527–536
- 1049 **Craft N, Shostak Y, Carey M, Sawyers CL** (1999) A mechanism for hormone-independent  
1050 prostate cancer through modulation of androgen receptor signaling by the HER-2/neu  
1051 tyrosine kinase. *Nat Med* **5**: 280–5
- 1052 **Davis AM, Hall A, Millar AJ, Darrah C, Davis SJ** (2009) Protocol: Streamlined sub-protocols  
1053 for floral-dip transformation and selection of transformants in *Arabidopsis thaliana*. *Plant*  
1054 *Methods* **5**: 3
- 1055 **Du J, Jiang H, Sun X, Li Y, Liu Y, Sun M, Fan Z, Cao Q, Feng L, Shang J, et al** (2018)  
1056 Auxin and Gibberellins Are Required for the Receptor-Like Kinase ERECTA Regulated  
1057 Hypocotyl Elongation in Shade Avoidance in *Arabidopsis*. *Front Plant Sci*. doi:  
1058 10.3389/fpls.2018.00124
- 1059 **Earley KW, Haag JR, Pontes O, Opper K, Juehne T, Song K, Pikaard CS** (2006) Gateway-

- 1060 compatible vectors for plant functional genomics and proteomics. *Plant J.* doi:  
1061 10.1111/j.1365-313X.2005.02617.x
- 1062 **Gaudino RJ, Pikaard CS** (1997) Cytokinin induction of RNA polymerase I transcription in  
1063 *Arabidopsis thaliana*. *J Biol Chem* **272**: 6799–6804
- 1064 **Giri DK, Ali-Seyed M, Li L-Y, Lee D-F, Ling P, Bartholomeusz G, Wang S-C, Hung M-C**  
1065 (2005) Endosomal transport of ErbB-2: mechanism for nuclear entry of the cell surface  
1066 receptor. *Mol Cell Biol* **25**: 11005–11018
- 1067 **Griffiths J, Murase K, Rieu I, Zentella R, Zhang Z-L, Powers SJ, Gong F, Phillips AL,**  
1068 **Hedden P, Sun T, et al** (2006) Genetic characterization and functional analysis of the GID1  
1069 gibberellin receptors in *Arabidopsis*. *Plant Cell* **18**: 3399–3414
- 1070 **Haasen D, Köhler C, Neuhaus G, Merkle T** (2002) Nuclear export of proteins in plants:  
1071 AtXPO1 is the export receptor for leucine-rich nuclear export signals in *Arabidopsis*  
1072 *thaliana*. *Plant J* **20**: 695–705
- 1073 **Heidstra R, Welch D, Scheres B** (2004) Mosaic analyses using marked activation and deletion  
1074 clones dissect *Arabidopsis* SCARECROW action in asymmetric cell division. *Genes Dev*  
1075 **18**: 1964–1969
- 1076 **Ho CMK, Paciorek T, Abrash E, Bergmann DC** (2016) Modulators of Stomatal Lineage  
1077 Signal Transduction Alter Membrane Contact Sites and Reveal Specialization among  
1078 ERECTA Kinases. *Dev Cell* **38**: 345–357
- 1079 **Hsu JL, Hung MC** (2016) The role of HER2, EGFR, and other receptor tyrosine kinases in  
1080 breast cancer. *Cancer Metastasis Rev* **35**: 575–588
- 1081 **Hu CD, Chinenov Y, Kerppola TK** (2002) Visualization of interactions among bZIP and Rel  
1082 family proteins in living cells using bimolecular fluorescence complementation. *Mol Cell* **9**:  
1083 789–798
- 1084 **Hung LY, Tseng JT, Lee YC, Xia W, Wang YN, Wu ML, Chuang YH, Lai CH, Chang WC**  
1085 (2008) Nuclear epidermal growth factor receptor (EGFR) interacts with signal transducer  
1086 and activator of transcription 5 (STAT5) in activating Aurora-A gene expression. *Nucleic*  
1087 *Acids Res* **36**: 4337–4351
- 1088 **James Cao H, Lin H-Y, Luidens MK, Davis FB, Davis PJ** (2009) Cytoplasm-To-Nucleus  
1089 Shuttling Of Thyroid Hormone Receptor- $\beta$ 1 (Tr $\beta$ 1) Is Directed From A Plasma Membrane  
1090 Integrin Receptor By Thyroid Hormone. *Endocr Res* **34**: 31–42

- 1091 **Karachaliou N, Pilotto S, Lazzari C, Bria E, de Marinis F, Rosell R** (2016) Cellular and  
1092 molecular biology of small cell lung cancer: an overview. *Transl Lung Cancer Res* **5**: 2–15
- 1093 **Komata M, Katou Y, Tanaka H, Nakato R, Shirahige K, Bando M** (2014) Chromatin  
1094 immunoprecipitation protocol for mammalian cells. *Methods Mol Biol* **1164**: 33–38
- 1095 **Kosentka PZ, Zhang L, Simon YA, Satpathy B, Maradiaga R, Mitoubsi O, Shpak ED**  
1096 (2017) Identification of critical functional residues of receptor-like kinase ERECTA. *J Exp*  
1097 *Bot* **68**: 1507–1518
- 1098 **Kosugi S, Hasebe M, Matsumura N, Takashima H, Miyamoto-Sato E, Tomita M,**  
1099 **Yanagawa H** (2009a) Six classes of nuclear localization signals specific to different binding  
1100 grooves of importin alpha. *J Biol Chem* **284**: 478–485
- 1101 **Kosugi S, Hasebe M, Tomita M, Yanagawa H** (2009b) Systematic identification of cell cycle-  
1102 dependent yeast nucleocytoplasmic shuttling proteins by prediction of composite motifs.  
1103 *Proc Natl Acad Sci U S A* **106**: 10171–10176
- 1104 **Kubala S, Garnczarska M, Wojtyła Ł, Clippe A, Kosmala A, Zmieńko A, Lutts S, Quinet M**  
1105 (2015) Deciphering priming-induced improvement of rapeseed (*Brassica napus* L.)  
1106 germination through an integrated transcriptomic and proteomic approach. *Plant Sci* **231**:  
1107 94–113
- 1108 **Lee H-H, Wang Y-N, Hung M-C** (2015a) Non-canonical signaling mode of the epidermal  
1109 growth factor receptor family. *Am J Cancer Res* **5**: 2944–2958
- 1110 **Lee JS, Hnilova M, Maes M, Lin Y-CL, Putarjunan A, Han S-K, Avila J, Torii KU** (2015b)  
1111 Competitive binding of antagonistic peptides fine-tunes stomatal patterning. *Nature* **522**:  
1112 439–443
- 1113 **Lee JS, Kuroha T, Hnilova M, Khatayevich D, Kanaoka MM, Mcabee JM, Sarikaya M,**  
1114 **Tamerler C, Torii KU** (2012) Direct interaction of ligand-receptor pairs specifying  
1115 stomatal patterning. *Genes Dev* **26**: 126–136
- 1116 **Lo HW, Hsu SC, Ali-Seyed M, Gunduz M, Xia W, Wei Y, Bartholomeusz G, Shih JY, Hung**  
1117 **MC** (2005) Nuclear interaction of EGFR and STAT3 in the activation of the iNOS/NO  
1118 pathway. *Cancer Cell* **7**: 575–589
- 1119 **Marti U, Burwen SJ, Wells A, Barker ME, Huling S, Feren AM, Jones AL** (1991)  
1120 Localization of epidermal growth factor receptor in hepatocyte nuclei. *Hepatology* **13**: 15–  
1121 20



- 1122 **Mayer K, Albrecht S, Schaller A** (2015) Targeted analysis of protein phosphorylation by 2D  
1123 electrophoresis. *Methods Mol Biol* **1306**: 167–176
- 1124 **Miettinen PJ, Berger JE, Meneses J, Phung Y, Pedersen RA, Werb Z, Derynck R** (1995)  
1125 Epithelial immaturity and multiorgan failure in mice lacking epidermal growth factor  
1126 receptor. *Nature* **376**: 337–341
- 1127 **Migliaccio A, Di Domenico M, Castoria G, Nanayakkara M, Lombardi M, De Falco A,**  
1128 **Bilancio A, Varricchio L, Ciociola A, Auricchio F** (2005) Steroid receptor regulation of  
1129 epidermal growth factor signaling through Src in breast and prostate cancer cells: Steroid  
1130 antagonist action. *Cancer Res* **65**: 10585–10593
- 1131 **Miller SG, Carnell L, Moore HPH** (1992) Post-Golgi membrane traffic: Brefeldin A inhibits  
1132 export from distal Golgi compartments to the cell surface but not recycling. *J Cell Biol* **118**:  
1133 267–283
- 1134 **Park CJ, Ronald PC** (2012) Cleavage and nuclear localization of the rice XA21 immune  
1135 receptor. *Nat Commun* **3**: 920
- 1136 **Pastore JJ, Limpuangthip A, Yamaguchi N, Wu MF, Sang Y, Han SK, Malaspina L,**  
1137 **Chavdaroff N, Yamaguchi A, Wagner D** (2011) LATE MERISTEM IDENTITY2 acts  
1138 together with LEAFY to activate APETALA1. *Development* **138**: 3189–3198
- 1139 **Phokas A, Coates JC** (2021) Evolution of DELLA function and signaling in land plants. *Evol*  
1140 *Dev* **23**: 137–154
- 1141 **Pignon J-C, Koopmansch B, Nolens G, Delacroix L, Waltregny D, Winkler R** (2009)  
1142 Androgen receptor controls EGFR and ERBB2 gene expression at different levels in  
1143 prostate cancer cell lines. *Cancer Res* **69**: 2941–2949
- 1144 **Plackett ARG, Powers SJ, Fernandez-Garcia N, Urbanova T, Takebayashi Y, Seo M,**  
1145 **Jikumaru Y, Benlloch R, Nilsson O, Ruiz-Rivero O, et al** (2012) Analysis of the  
1146 Developmental Roles of the Arabidopsis Gibberellin 20-Oxidases Demonstrates That  
1147 GA20ox1, -2, and -3 Are the Dominant Paralogs. *Plant Cell* **24**: 941–960
- 1148 **Prigent SA, Gullick WJ** (1994) Identification of c-erbB-3 binding sites for phosphatidylinositol  
1149 3'-kinase and SHC using an EGF receptor/c-erbB-3 chimera. *EMBO J* **13**: 2831–2841
- 1150 **Qi Y, Sun Y, Xu L, Xu Y, Huang H** (2004) ERECTA is required for protection against heat-  
1151 stress in the AS1/AS2 pathway to regulate adaxial-abaxial leaf polarity in Arabidopsis.  
1152 *Planta* **219**: 270–276



- 1153 **Ragni L, Nieminen K, Pacheco-Villalobos D, Sibout R, Schwechheimer C, Hardtke CS**  
1154 (2011) Mobile Gibberellin Directly Stimulates Arabidopsis Hypocotyl Xylem Expansion.  
1155 *Plant Cell* **23**: 1322–1336
- 1156 **Rosa NM Ia, Pfeiffer A, Hill K, Locascio A, Bhalerao RP, Miskolczi P, Grønlund AL,**  
1157 **Wanchoo-Kohli A, Thomas SG, Bennett MJ, et al** (2015) Genome Wide Binding Site  
1158 Analysis Reveals Transcriptional Coactivation of Cytokinin-Responsive Genes by DELLA  
1159 Proteins. *PLOS Genet* **11**: e1005337
- 1160 **Sacharowski SP, Gratkowska DM, Sarnowska EA, Kondrak P, Jancewicz I, Porri A,**  
1161 **Bucior E, Rolicka AT, Franzen R, Kowalczyk J, et al** (2015) SWP73 subunits of  
1162 arabidopsis SWI/SNF chromatin remodeling complexes play distinct roles in leaf and flower  
1163 development. *Plant Cell* **27**: 1889–1906
- 1164 **Sáez A, Rodrigues A, Santiago J, Rubio S, Rodriguez PL** (2008) HAB1-SWI3B interaction  
1165 reveals a link between abscisic acid signaling and putative SWI/SNF chromatin-remodeling  
1166 complexes in Arabidopsis. *Plant Cell* **20**: 2972–88
- 1167 **Saleh A, Alvarez-Venegas R, Avramova Z** (2008) An efficient chromatin immunoprecipitation  
1168 (ChIP) protocol for studying histone modifications in Arabidopsis plants. *Nat Protoc* **3**:  
1169 1018–1025
- 1170 **Salem MA, Jüppner J, Bajdzienko K, Giavalisco P** (2016) Protocol: a fast, comprehensive and  
1171 reproducible one-step extraction method for the rapid preparation of polar and semi-polar  
1172 metabolites, lipids, proteins, starch and cell wall polymers from a single sample. *Plant*  
1173 *Methods* 2016 121 **12**: 1–15
- 1174 **Sarnowska E, Gratkowska DM, Sacharowski SP, Cwiek P, Tohge T, Fernie AR, Siedlecki**  
1175 **JA, Koncz C, Sarnowski TJ** (2016) The Role of SWI/SNF Chromatin Remodeling  
1176 Complexes in Hormone Crosstalk. *Trends Plant Sci* **21**: 594–608
- 1177 **Sarnowska EA, Rolicka AT, Bucior E, Cwiek P, Tohge T, Fernie AR, Jikumaru Y, Kamiya**  
1178 **Y, Franzen R, Schmelzer E, et al** (2013) DELLA-Interacting SWI3C Core Subunit of  
1179 Switch/Sucrose Nonfermenting Chromatin Remodeling Complex Modulates Gibberellin  
1180 Responses and Hormonal Cross Talk in Arabidopsis. *Plant Physiol* **163**: 305–317
- 1181 **Sarnowski TJ, Swiezewski S, Pawlikowska K, Kaczanowski S, Jerzmanowski A** (2002)  
1182 AtSWI3B, an Arabidopsis homolog of SWI3, a core subunit of yeast Swi/Snf chromatin  
1183 remodeling complex, interacts with FCA, a regulator of flowering time. *Nucleic Acids Res*

- 1184       **30**: 3412–3421
- 1185   **Schmittgen TD, Livak KJ** (2008) Analyzing real-time PCR data by the comparative CT method.
- 1186       *Nat Protoc* **3**: 1101–1108
- 1187   **Shpak ED** (2003) Dominant-Negative Receptor Uncovers Redundancy in the Arabidopsis
- 1188       ERECTA Leucine-Rich Repeat Receptor-Like Kinase Signaling Pathway That Regulates
- 1189       Organ Shape. *Plant Cell Online* **15**: 1095–1110
- 1190   **Shpak ED** (2013) Diverse roles of ERECTA family genes in plant development. *J Integr Plant*
- 1191       *Biol* **55**: 1238–1250
- 1192   **Shpak ED, Berthiaume CT, Hill EJ, Torii KU** (2004) Synergistic interaction of three
- 1193       ERECTA-family receptor-like kinases controls Arabidopsis organ growth and flower
- 1194       development by promoting cell proliferation. *Development* **131**: 1491–1501
- 1195   **Shpak ED, McAbee JM, Pillitteri LJ, Torii KU** (2005) Stomatal Patterning and Differentiation
- 1196       by Synergistic Interactions of Receptor Kinases. *Science* (80- ) **309**: 290–293
- 1197   **Simossis VA, Kleinjung J, Heringa J** (2005) Homology-extended sequence alignment. *Nucleic*
- 1198       *Acids Res* **33**: 816–824
- 1199   **Stewart M, Turley H, Cook N, Pezzella F, Pillai G, Ogilvie D, Carlidge S, Paterson D,**
- 1200       **Copley C, Kendrew J, et al** (2003) The angiogenic receptor KDR is widely distributed in
- 1201       human tissues and tumours and relocates intracellularly on phosphorylation. An
- 1202       immunohistochemical study. *Histopathology* **43**: 33–39
- 1203   **Tameshige T, Okamoto S, Tasaka M, Torii KU** (2016) Impact of erecta mutation on leaf
- 1204       serration differs between Arabidopsis accessions. *Plant Signal Behav* **11** (12): 2478–2485
- 1205   **Torii KU, Mitsukawa N, Oosumi T, Matsuura Y, Yokoyama R, Whittier RF, Komeda Y**
- 1206       (1996) The Arabidopsis ERECTA gene encodes a putative receptor protein kinase with
- 1207       extracellular leucine-rich repeats. *Plant Cell* **8**: 735–746
- 1208   **Torii KU, Pillitteri LJ, Sloan DB, Bogenschutz NL** (2007) Termination of asymmetric cell
- 1209       division and differentiation of stomata. *Nature* **445**: 501–505
- 1210   **Uchida N, Lee JS, Horst RJ, Lai H-H, Kajita R, Kakimoto T, Tasaka M, Torii KU** (2012a)
- 1211       Regulation of inflorescence architecture by intertissue layer ligand-receptor communication
- 1212       between endodermis and phloem. *Proc Natl Acad Sci* **109**: 6337–6342
- 1213   **Uchida N, Shimada M, Tasaka M** (2013) ERECTA-family receptor kinases regulate stem cell
- 1214       homeostasis via buffering its cytokinin responsiveness in the shoot apical meristem. *Plant*

- 1215 Cell Physiol **54**: 343–351
- 1216 **Uchida N, Shimada M, Tasaka M** (2012b) Modulation of the balance between stem cell  
1217 proliferation and consumption by ERECTA-family genes. *Plant Signal Behav* **7**: 1506–1508
- 1218 **Willige BC, Ghosh S, Nill C, Zourelidou M, Dohmann EMN, Maier A, Schwechheimer C**  
1219 (2007) The DELLA domain of GA INSENSITIVE mediates the interaction with the GA  
1220 INSENSITIVE DWARF1A gibberellin receptor of Arabidopsis. *Plant Cell* **19**: 1209–1220
- 1221 **Wojtyla Ł, Rucińska-Sobkowiak R, Kubala S, Garnczarska M** (2013) Lupine embryo axes  
1222 under salinity stress. I. Ultrastructural response. *Acta Physiol Plant* **35**: 2219–2228
- 1223 **Wong RWC** (2003) Transgenic and knock-out mice for deciphering the roles of EGFR ligands.  
1224 *Cell Mol Life Sci* **60**: 113–118
- 1225 **Woodward AW, Bartel B** (2005) A receptor for auxin. *Plant Cell* **17**: 2425–2429
- 1226 **Yarden Y, Sliwkowski MX** (2001) Untangling the ErbB signalling network. *Nat Rev Mol Cell*  
1227 *Biol* **2**: 127–137
- 1228 **Van Zanten M, Basten Snoek L, Van Eck-Stouten E, Proveniers MCG, Torii KU, Voesenek**  
1229 **LACJ, Peeters AJM, Millenaar FF** (2010) Ethylene-induced hyponastic growth in  
1230 *Arabidopsis thaliana* is controlled by ERECTA. *Plant J* **61**: 83–95
- 1231 **Zentella R, Zhang Z-L, Park M, Thomas SG, Endo A, Murase K, Fleet CM, Jikumaru Y,**  
1232 **Nambara E, Kamiya Y, et al** (2007) Global analysis of della direct targets in early  
1233 gibberellin signaling in Arabidopsis. *Plant Cell* **19**: 3037–3057
- 1234 **Zhang L, DeGennaro D, Lin G, Chai J, Shpak ED** (2021) ERECTA family signaling  
1235 constrains CLAVATA3 and WUSCHEL to the center of the shoot apical meristem.  
1236 *Development*. doi: 10.1242/DEV.189753
- 1237
